# Supplementary material for: Exploring Genotype-by-Environment Interactions of Chemical Composition of Raspberry by Using a Metabolomics Approach
Source: Metabolites. 2021 Jul 28;11(8):490. doi: 10.3390/metabo11080490 (PMC8398420; doi:10.3390/metabo11080490)
Supplement: Supplementary file 1 [file metabolites-11-00490-s001.zip]

Archive with 5 entries (5 files):
- supplementary figures.pdf
- Supplementary Table S1 (1).xlsx
- Supplementary Table S5 (1).xlsx
- Supplementary Table S6 (1).xlsx
- Supplementary Tables S2-S4_revised.xlsx
