# Supplementary material for: Exploring Genotype-by-Environment Interactions of Chemical Composition of Raspberry by Using a Metabolomics Approach
Source: Metabolites. 2021 Jul 28;11(8):490. doi: 10.3390/metabo11080490 (PMC8398420; doi:10.3390/metabo11080490)
Supplement: Supplementary file 1 [file metabolites-11-00490-s001.zip › Supplementary Table S1 (1).xlsx]

## Sheet: Hoja1
Table S1. Cultivars used in this study, with their respective parental lines and origins.
Cultivar	Parentage	Origin	Characteristics	Reference
Glen Ample	SCRI 7326E1 × SCRI 7412H16 (Derivative of Glen Prosen, Meeker, Preussen, Malling Promise)	James Hutton Institute Invergrowrie, Dundee (Scotland)	High adaptability to Nordic climate, high yield, good taste, light-red colour	(1,2)
Schönemann	'Lloyd George' × 'Preußen'	Germany (Breeder W. Schönemann, Fellbach)	Moderate to high yield, sweet/strong aromatic, dark-red colour	(2)
Tulameen	'Nootka' x 'Glen Prosen'	Agriculture and AgriFood Canada's Pacific Agriculture Research Center (Canada)	High yield, red-violet colour	(3), Bundessortenamt.de (2006)
Veten	Asker' x 'Lloyd George'	Norway Statens Forskings Station, Njøs (Norway)	Dark violet colour, use for conserving	(4), Bundessortenamt.de (2006)
1.	Fernández-Fernández, F.; Antanaviciute, L.; Govan, C.L.; Sargent, D.J. Development of a multiplexed microsatellite set for fingerprinting red raspberry (Rubus idaeus) germplasm and its transferability to other Rubus species. J. Berry Res. 2011, 1, 177–187, doi:10.3233/JBR-2011-019.
2.	Girichev, V.; von Reth, M.; Hanke, M.V.; Höfer, M.; Schulte, E.; Flachowsky, H. Evaluation of Rubus genetic resources on their resistance to cane disease. Genet. Resour. Crop Evol. 2018, 65, 1979–1993, doi:10.1007/s10722-018-0670-1.
3.	Daubeny, H.; Kempler, C. “Tulameen” red raspberry. J. Am. Pomol. Soc. 2003, 57, 42–44, doi:10.21273/hortsci.26.10.1336.
4.	Moore, P.P. Chloroplast DNA Diversity in Raspberry. J. Am. Soc. Hortic. Sci. 2019, 118, 371–376, doi:10.21273/jashs.118.3.371.
