# Supplementary material for: Exploring Genotype-by-Environment Interactions of Chemical Composition of Raspberry by Using a Metabolomics Approach
Source: Metabolites. 2021 Jul 28;11(8):490. doi: 10.3390/metabo11080490 (PMC8398420; doi:10.3390/metabo11080490)
Supplement: Supplementary file 1 [file metabolites-11-00490-s001.zip › Supplementary Table S5 (1).xlsx]

## Sheet: primario
Supplementary Table S5. Broad sense heritability (H2) for primary metabolites
Metabolite	H2
Glutamine	0.0137461
Glycerol	0.0175581
Citric acid	0.0217798
Pyroglutamic acid	0.0294702
Proline	0.0311725
Lysine	0.0439652
Isoleucine	0.0464139
Alanine	0.0504113
Glycine	0.0568776
Methionine	0.0620987
Fumaric acid	0.0752036
Rhamnose	0.0842153
O-methyl-α-Mannopyranoside	0.0914386
Malic acid	0.0939768
Threonine	0.0959891
Valine	0.105716
GABA	0.106813
Erythritol	0.123777
Cysteine	0.13864
Trehalose	0.143841
Asparagine	0.14527
Serine	0.147019
Spermidine	0.149033
Tryptophan	0.170329
Aspartic acid	0.181224
beta-Alanine	0.186063
Glyceric acid	0.196043
Ornithine	0.203637
Succinic acid	0.204195
Tyrosine	0.229024
myo-Inositol	0.240121
Quinic acid	0.241914
Fructose	0.261948
Phenylalanine	0.274614
Glutamic acid	0.298705
Glucose	0.312907
Pyruvic acid	0.347506
Phosphoric acid	0.381115
Sucrose	0.430103
Dehydroascorbic acid	0.447666
Galactinol	0.454984
Putrescine	0.480606
Tyramine	0.57891
Raffinose	0.583263
Maltose	0.601667
Fucose	0.62771
Xylose	0.704856

## Sheet: secundario
Supplementary Table S5. Broad-sense heritability (H2) forsecondarymetabolites
Metabolite	H2
Kaempferol-xyloside-glucoside	0.0287519
Quercetin-3-glucuronide	0.0616275
Ellagic-acid-4-acetyl-arabinoside	0.125223
Unknown flavonol	0.133563
p-Coumaroyl-glucose	0.161789
Quercetin-3-glucoside	0.163676
Ellagic tannin 1	0.22638
Kaempferol-3-galactoside	0.317108
Ellagic-acid-4-acetyl-xyloside	0.359206
Kaempferol-3-glucoside	0.37837
Ellagic acid rhamnoside	0.445168
Catechin	0.448059
Ellagic acid derivate	0.452097
Cyanidin-3-sophoroside	0.486128
Pelargonidin-3-rutinoside	0.527004
Cyanidin-3-glycosy -rutinoside	0.536354
Ellagic tannin 2	0.549864
Cyanidin-3-xylosyl-rutinoside	0.645253
Pelargonidin-3-glucoside	0.645789
Cyanidin-3-rutinoside	0.717492
Cyanidin-3-glycoside	0.736162
p-Coumaroyl-glucose derivate	0.75317
Procyanidin B1	0.767155
Ellagic acid	0.78248
Ellagic acid pentoside	0.784693

## Sheet: volatile
Supplementary Table S5. Broad sense heritability (H2) for volatiles
Metabolite	H2
Decane	0.0107066
2-Pentylfuran	0.0133856
Butyl butanoate	0.0210428
3,4-Dimethylbenzaldehyde	0.0231421
Butyl hexanoate	0.024266
1-Hexanol	0.0276628
Methyl octanoate	0.037076
γ-Decalactone	0.0391682
2,4-Heptadienal	0.0414398
E-2-Octenal	0.0419252
Butyl acetate	0.0459921
cis-Geranylacetone	0.0479736
Propyl butanoate	0.0557447
2-Hexenal	0.0560281
6,6-Dimethylacetate	0.0587132
2-Nonanol	0.0614372
Benzaldehyde	0.0682997
Octanal	0.069784
Eugenol	0.0721455
γ-Dodecalactone	0.0752157
Isopentyl butanoate	0.0764169
1-Octanol	0.0773547
Octyl butanoate	0.0800378
Methyl 3-hydroxyoctonoate	0.0965622
Methyl butyrate	0.0968753
6-Methyl-5-hepten-2-one	0.104945
Methyl pentanoate	0.109921
Decanal	0.118646
Heptanal	0.119749
2-Pentenal	0.12594
Pentanal	0.129866
Mesifurane	0.134991
Pentyl acetate	0.139402
Methyl hex-2-enoate	0.141513
2-Heptenal	0.143309
Ethyl butanoate	0.144058
2-Nonanone	0.156292
Ethyl hexanoate	0.167289
Acetone	0.179002
Nerolidol	0.184775
Hexanal	0.19948
Nerol	0.206164
Nonanal	0.21006
Limonene	0.228825
Terpineol	0.229916
β-Ionone	0.237983
Isopentyl acetate	0.24445
Methyl dodecanoate	0.246016
Ethyl acetate	0.248716
Linalool	0.25817
cis-3-Hexenyl acetate	0.309144
3-Hexenal	0.310212
Methy lacetate	0.333287
Myrtenol	0.335666
1-Penten-3-one	0.378802
1-Penten-3-ol	0.386715
Cinnamyl acetate	0.392402
Methyl benzoate	0.423715
2-Heptanol	0.47813
Acetophenone	0.517745
2-Heptanone	0.528203
E-2-Nonenal	0.537236
Methyl hexanoate	0.572356
Benzyl acetate	0.683875
Prenyl acetate	0.714844
