# Supplementary material for: Exploring Genotype-by-Environment Interactions of Chemical Composition of Raspberry by Using a Metabolomics Approach
Source: Metabolites. 2021 Jul 28;11(8):490. doi: 10.3390/metabo11080490 (PMC8398420; doi:10.3390/metabo11080490)
Supplement: Supplementary file 1 [file metabolites-11-00490-s001.zip › Supplementary Table S6 (1).xlsx]

## Sheet: Hoja1
Supplementary Table S6. Common volatiles between locations in the four assessed genotypes
Glen Ample			Schönemann			Tulameen			Veten
Germany	Poland	Norway	Germany	Poland	Norway	Germany	Poland	Norway	Germany	Poland	Norway
Acetone	Acetone	Acetone	Acetone	Acetone	Acetone	Acetone	Acetone	Acetone	Acetone	Acetone	Acetone
Acetophenone	Acetophenone	Acetophenone	Acetophenone	Acetophenone	Acetophenone	Acetophenone	Acetophenone	Acetophenone	Acetophenone	Acetophenone	Acetophenone
Benzaldehyde	Benzaldehyde	Benzaldehyde	Benzaldehyde	Benzaldehyde	Benzaldehyde	Benzyl acetate	Benzyl acetate	Benzyl acetate	Benzaldehyde	Benzaldehyde	Benzaldehyde
Benzyl acetate	Benzyl acetate	Benzyl acetate	Benzyl acetate	Benzyl acetate	Benzyl acetate	cis-3-Hexenyl acetate	cis-3-Hexenyl acetate	cis-3-Hexenyl acetate	Benzyl acetate	Benzyl acetate	Benzyl acetate
Cinnamyl acetate	Cinnamyl acetate	Cinnamyl acetate	Cinnamyl acetate	Cinnamyl acetate	Cinnamyl acetate	Decanal	Decanal	Decanal	Beta-Ionone	Beta-Ionone	Beta-Ionone
E-3-hexenyl acetate	E-3-hexenyl acetate	E-3-hexenyl acetate	cis-3-Hexenyl acetate	cis-3-Hexenyl acetate	cis-3-Hexenyl acetate	Decane	Decane	Decane	cis-3-Hexenyl acetate	cis-3-Hexenyl acetate	cis-3-Hexenyl acetate
E-2-Nonenal	E-2-Nonenal	E-2-Nonenal	Decanal	Decanal	Decanal	E-2-Nonenal	E-2-Nonenal	E-2-Nonenal	cis-Geranylacetone	cis-Geranylacetone	cis-Geranylacetone
E-2-Octenal	E-2-Octenal	E-2-Octenal	Decane	Decane	Decane	E-2-Octenal	E-2-Octenal	E-2-Octenal	Decanal	Decanal	Decanal
Eugenol	Eugenol	Eugenol	E-2-Nonenal	E-2-Nonenal	E-2-Nonenal	Ethyl acetate	Ethyl acetate	Ethyl acetate	Decane	Decane	Decane
gamma-decalactone	gamma-decalactone	gamma-decalactone	E-2-Octenal	E-2-Octenal	E-2-Octenal	Ethyl hexanoate	Ethyl hexanoate	Ethyl hexanoate	E-2-Nonenal	E-2-Nonenal	E-2-Nonenal
gamma-dodecalactone	gamma-dodecalactone	gamma-dodecalactone	Ethyl butanoate	Ethyl butanoate	Ethyl butanoate	Eugenol	Eugenol	Eugenol	E-2-Octenal	E-2-Octenal	E-2-Octenal
Hexanal	Hexanal	Hexanal	Eugenol	Eugenol	Eugenol	gamma-Decalactone	gamma-Decalactone	gamma-Decalactone	Ethyl acetate	Ethyl acetate	Ethyl acetate
hexyl hexanoate	hexyl hexanoate	hexyl hexanoate	gamma-Decalactone	gamma-Decalactone	gamma-Decalactone	gamma-Dodecalactone	gamma-Dodecalactone	gamma-Dodecalactone	Ethyl butanoate	Ethyl butanoate	Ethyl butanoate
Mesifurane	Mesifurane	Mesifurane	gamma-Dodecalactone	gamma-Dodecalactone	gamma-Dodecalactone	Heptanal	Heptanal	Heptanal	Ethyl hexanoate	Ethyl hexanoate	Ethyl hexanoate
Methyl-3-hydroxyoctonoate	Methyl-3-hydroxyoctonoate	Methyl-3-hydroxyoctonoate	Heptanal	Heptanal	Heptanal	Hexanal	Hexanal	Hexanal	Eugenol	Eugenol	Eugenol
Methyl acetate	Methyl acetate	Methyl acetate	Hexanal	Hexanal	Hexanal	Hexyl hexanoate	Hexyl hexanoate	Hexyl hexanoate	gamma-Dodecalactone	gamma-Dodecalactone	gamma-Dodecalactone
Methyl dodecanoate	Methyl dodecanoate	Methyl dodecanoate	Hexyl hexanoate	Hexyl hexanoate	Hexyl hexanoate	Isopentyl butanoate	Isopentyl butanoate	Isopentyl butanoate	Heptanal	Heptanal	Heptanal
Methyl hexanoate	Methyl hexanoate	Methyl hexanoate	Isopentyl acetate	Isopentyl acetate	Isopentyl acetate	Linalool	Linalool	Linalool	Hexanal	Hexanal	Hexanal
Methyl octanoate	Methyl octanoate	Methyl octanoate	Limonene	Limonene	Limonene	Mesifurane	Mesifurane	Mesifurane	Hexyl hexanoate	Hexyl hexanoate	Hexyl hexanoate
Methyl pentanoate	Methyl pentanoate	Methyl pentanoate	Linalool	Linalool	Linalool	Methyl dodecanoate	Methyl dodecanoate	Methyl dodecanoate	Linalool	Linalool	Linalool
Myrtenol	Myrtenol	Myrtenol	Methyl-3-hydroxyoctonoate	Methyl-3-hydroxyoctonoate	Methyl-3-hydroxyoctonoate	Methyl hexanoate	Methyl hexanoate	Methyl hexanoate	Mesifurane	Mesifurane	Mesifurane
Nerol	Nerol	Nerol	Methyl acetate	Methyl acetate	Methyl acetate	Methyl octonoate	Methyl octonoate	Methyl octonoate	Methyl acetate	Methyl acetate	Methyl acetate
Nerolidol	Nerolidol	Nerolidol	Methyl benzoate	Methyl benzoate	Methyl benzoate	Methyl pentanoate	Methyl pentanoate	Methyl pentanoate	Methyl benzoate	Methyl benzoate	Methyl benzoate
Nonanal	Nonanal	Nonanal	Methyl butyrate	Methyl butyrate	Methyl butyrate	Nonanal	Nonanal	Nonanal	Methyl butyrate	Methyl butyrate	Methyl butyrate
Pentanal	Pentanal	Pentanal	Methyl dodecanoate	Methyl dodecanoate	Methyl dodecanoate	Pentanal	Pentanal	Pentanal	Methyl dodecanoate	Methyl dodecanoate	Methyl dodecanoate
Prenyl acetate	Prenyl acetate	Prenyl acetate	Methyl hexanoate	Methyl hexanoate	Methyl hexanoate	Prenyl acetate	Prenyl acetate	Prenyl acetate	Methyl hex-2-enoate	Methyl hex-2-enoate	Methyl hex-2-enoate
Terpineol	Terpineol	Terpineol	Methyl octanoate	Methyl octanoate	Methyl octanoate	Propyl butanoate	Propyl butanoate	Propyl butanoate	Methyl octanoate	Methyl octanoate	Methyl octanoate
1-Octanol	1-Octanol	1-Octanol	Methyl pentanoate	Methyl pentanoate	Methyl pentanoate	Terpineol	Terpineol	Terpineol	Myrtenol	Myrtenol	Myrtenol
1-Penten-3-one	1-Penten-3-one	1-Penten-3-one	Myrtenol	Myrtenol	Myrtenol	1-Octanol	1-Octanol	1-Octanol	Nerol	Nerol	Nerol
2,4-Heptadienal	2,4-Heptadienal	2,4-Heptadienal	Nerol	Nerol	Nerol	1-Penten-3-one	1-Penten-3-one	1-Penten-3-one	Nonanal	Nonanal	Nonanal
2-Heptanol	2-Heptanol	2-Heptanol	Nonanal	Nonanal	Nonanal	2,4-Heptadienal	2,4-Heptadienal	2,4-Heptadienal	Pentanal	Pentanal	Pentanal
2-Heptanone	2-Heptanone	2-Heptanone	Pentanal	Pentanal	Pentanal	2-Heptanone	2-Heptanone	2-Heptanone	Pentyl acetate	Pentyl acetate	Pentyl acetate
2-Heptenal	2-Heptenal	2-Heptenal	Prenyl acetate	Prenyl acetate	Prenyl acetate	2-Heptenal	2-Heptenal	2-Heptenal	Prenyl acetate	Prenyl acetate	Prenyl acetate
2-Hexanal	2-Hexanal	2-Hexanal	Propyl butanoate	Propyl butanoate	Propyl butanoate	2-Hexenal	2-Hexenal	2-Hexenal	Propyl butanoate	Propyl butanoate	Propyl butanoate
2-Nonanone	2-Nonanone	2-Nonanone	Terpineol	Terpineol	Terpineol	2-Nonanone	2-Nonanone	2-Nonanone	Terpineol	Terpineol	Terpineol
2-Pentenal	2-Pentenal	2-Pentenal	1-Octanol	1-Octanol	1-Octanol	2-Pentenal	2-Pentenal	2-Pentenal	1-Octanol	1-Octanol	1-Octanol
2-Pentylfuran	2-Pentylfuran	2-Pentylfuran	1-Penten-3-ol	1-Penten-3-ol	1-Penten-3-ol	2-Pentylfuran	2-Pentylfuran	2-Pentylfuran	1-Penten-3-ol	1-Penten-3-ol	1-Penten-3-ol
3,4-Dimethylbenzaldehyde	3,4-Dimethylbenzaldehyde	3,4-Dimethylbenzaldehyde	1-Penten-3-one	1-Penten-3-one	1-Penten-3-one	3,4-Dimethylbenzaldehyde	3,4-Dimethylbenzaldehyde	3,4-Dimethylbenzaldehyde	2,4-Heptadienal	2,4-Heptadienal	2,4-Heptadienal
6-methyl-5-hepten-2-one	6-methyl-5-hepten-2-one	6-methyl-5-hepten-2-one	2,4-Heptadienal	2,4-Heptadienal	2,4-Heptadienal	6-Methyl-5-hepten-2-one	6-Methyl-5-hepten-2-one	6-Methyl-5-hepten-2-one	2-Heptanone	2-Heptanone	2-Heptanone
cis-Geranylacetone	beta-Ionone	beta-Ionone	2-Heptanol	2-Heptanol	2-Heptanol	Benzaldehyde	Benzaldehyde	Beta-ionone	2-Hexenal	2-Hexenal	2-Hexenal
Decanal	Decanal	Decanal	2-Heptanone	2-Heptanone	2-Heptanone	Cinnamyl acetate	Cinnamyl acetate	Isopentyl acetate	2-Nonanol	2-Nonanol	2-Nonanol
Ethyl butanoate	Decane	Decane	2-Heptenal	2-Heptenal	2-Heptenal	cis-Geranylacetone	cis-Geranylacetone	Methyl acetate	2-Nonanone	2-Nonanone	2-Nonanone
Heptanal	Ethyl acetate	Ethyl acetate	2-Hexenal	2-Hexenal	2-Hexenal	Ethyl butanoate	Ethyl butanoate	Nerolidol	2-Pentenal	2-Pentenal	2-Pentenal
Isopentyl butanoate	Ethyl hexanoate	Ethyl hexanoate	2-Nonanol	2-Nonanol	2-Nonanol	Limonene	Limonene	1-Penten-3-ol	2-Pentylfuran	2-Pentylfuran	2-Pentylfuran
Limonene	Linalool	Linalool	2-Nonanone	2-Nonanone	2-Nonanone	Methyl-3-hydroxyoctonoate	Methyl-3-hydroxyoctonoate	6,6-Dimethyl acetate	3,4-Dimethylbenzaldehyde	3,4-Dimethylbenzaldehyde	3,4-Dimethylbenzaldehyde
Linalool	Methyl benzoate	Methyl benzoate	2-Pentenal	2-Pentenal	2-Pentenal	Methyl acetate	Methyl acetate	Butyl acetate	3-Hexenal	3-Hexenal	3-Hexenal
Methyl benzoate	Propyl butanoate	Propyl butanoate	2-Pentylfuran	2-Pentylfuran	2-Pentylfuran	Methyl benzoate	Methyl benzoate	Butyl butanoate	6,6-Dimethyl acetate	6,6-Dimethyl acetate	6,6-Dimethyl acetate
Methyl butyrate	6,6-Dimethyl acetate	6,6-Dimethyl acetate	3-Hexenal	3-Hexenal	3-Hexenal	Methyl hex-2-enoate	Methyl hex-2-enoate	Butyl hexanoate	6-Methyl-5-hepten-2-one	6-Methyl-5-hepten-2-one	6-Methyl-5-hepten-2-one
Methyl hex-2-enoate	6,6-Dimethyl acetate	6,6-Dimethyl acetate	6-Methyl-5-hepten-2-one	6-Methyl-5-hepten-2-one	6-Methyl-5-hepten-2-one	Myrtenol	Myrtenol	cis-Geranylacetone	Cinnamyl acetate	gamma-Decalactone	gamma-Decalactone
1-Penten-3-ol	cis-Geranylacetone	Butyl acetate	cis-Gernaylacetone	cis-Gernaylacetone	Ethyl acetate	Nerol	Nerol	Isopentyl acetate	Isopentyl butanoate	Methyl-3-hydroxyoctonoate	Methyl-3-hydroxyoctonoate
2-Nonanol	Decanal	Butyl butanoate	Isopentyl butanoate	Isopentyl butanoate	Ethyl hexanoate	1-Hexanol	1-Hexanol	Methyl-3-hydroxyoctonoate	Limonene	Nerolidol	Nerolidol
3-Hexenal	Ethyl butanoate	Butyl hexanoate	Methyl hex-2-enoate	Methyl hex-2-enoate	Mesifurane	1-Penten-3-ol	1-Penten-3-ol	Methyl benzoate	Methyl hexanoate	2-Heptanol	2-Heptanol
Butyl acetate	Heptanal	cis-Geranylacetone	3,4-Dimethylbenzaldehyde	3,4-Dimethylbenzaldehyde	Nerolidol	2-Heptanol	2-Heptanol	Methyl butyrate	Methyl pentanoate	Cinnamyl acetate	Butyl acetate
Butyl butanoate	Isopentyl butanoate	Decane	Butyl acetate	Ethyl acetate	6,6-Dimethyl acetate	2-Nonanol	2-Nonanol	Nerol	1-Hexanol	Isopentyl butanoate	Butyl butanoate
Butyl hexanoate	Limonene	Ethyl acetate	Butyl butanoate	Ethyl hexanoate	Butyl acetate	3-Hexenal	3-Hexenal	Octanal	1-Penten-3-one	Limonene	Butyl hexanoate
cis-Geranylacetone	Linalool	Heptanal	Butyl hexanoate	Mesifurane	Butyl butanoate	Butyl acetate	Beta-ionone	Pentyl acetate	2-Heptenal	Methyl hexanoate	Cinnamyl acetate
Decane	Methyl benzoate	Isopentyl acetate	Isopentyl butanoate	Nerolidol	Butyl hexanoate	Butyl butanoate	Isopentyl acetate	1-Hexanol	Butyl acetate	Methyl pentanoate	Isopentyl acetate
Ethyl acetate	Methyl butyrate	Isopentyl butanoate	Nerolidol	6,6-Dimethyl acetate	Isopentyl butanoate	Butyl hexanoate	Methyl acetate	2-Heptanol	Butyl butanoate	1-Hexanol	Isopentyl butanoate
Heptanal	Methyl hex-2-enoate	Methyl butyrate	Octanal		Nerolidol	cis-Geranylacetone	Nerolidol	3-Hexenal	Butyl hexanoate	1-Penten-3-one	Limonene
Isopentyl acetate	1-Penten-3-ol	Octanal	Pentyl acetate		Octanal	Isopentyl acetate	1-Penten-3-ol	6,6-Dimethyl acetate	Cinnamyl acetate	2-Heptenal	Methyl pentanoate
Isopentyl butanoate	2-Nonanol	Pentyl acetate	1-Hexanol		Pentyl acetate	Methyl-3-hydroxyoctonoate	6,6-Dimethyl acetate		Isopentyl acetate		Octanal
Methyl butyrate	3-Hexenal	Propyl butanoate	3,4-Dimethylbenzaldehyde		1-Hexanol	Methyl benzoate			Isopentyl butanoate		1-Hexanol
Octanal		1-Hexanol	6,6-Dimethyl acetate		3,4-Dimethylbenzaldehyde	Methyl butyrate			Limonene		1-Penten-3-one
Pentyl acetate		1-Penten-3-ol	beta-Ionone		6,6-Dimethyl acetate	Nerol			Methyl pentanoate		2-Heptanol
Propyl butanoate		2-Nonanol			beta-Ionone	Octanal			Octanal		2-Heptenal
1-Hexanol		3-Hexenal				Pentyl acetate			1-Hexanol
1-Penten-3-ol						1-Hexanol			1-Penten-3-one
2-Nonanol						2-Heptanol			2-Heptanol
3-Hexenal						3-Hexenal			2-Heptenal
						6,6-Dimethyl acetate
