# Supplementary material for: Exploring Genotype-by-Environment Interactions of Chemical Composition of Raspberry by Using a Metabolomics Approach
Source: Metabolites. 2021 Jul 28;11(8):490. doi: 10.3390/metabo11080490 (PMC8398420; doi:10.3390/metabo11080490)
Supplement: Supplementary file 1 [file metabolites-11-00490-s001.zip › Supplementary Tables S2-S4_revised.xlsx]

## Sheet: Table S2
Table S2. Primary metabolites profiling of raspberry fruits harvested in 2018. Metabolite relative content is shown and represent each biological replicate per harvest date.
Harvest	Location	Genotype	Alanine	Pyruvic acid	Valine	Glycerol	Isoleucine	Glycine	Phosphoric acid	Proline	Glyceric acid	Serine	Succinic acid	Threonine	Fumaric acid	β-Alanine	Erythritol	Malic acid	GABA	Aspartic acid	Cysteine	Methionine	Glutamine	Xylose	Pyroglutamic acid	Glutamic acid	Rhamnose	Putrescine	Fucose	Phenylalanine	Asparagine	O-methyl-α-Mannopyranoside	Ornithine	Quinic acid	Lysine	Dehydroascorbic acid	Tyramine	myo-Inositol	Tyrosine	Spermidine	Tryptophan	Maltose	Trehalose	Galactinol	Raffinose	Fructose	Glucose	Citric acid	Sucrose
A	Norway	Glen Ample	0.317623	0.322661	0.36035	0.238846	0.342394	0.361667	0.406373	0.913503	0.797618	0.294977	0.80665	0.362022	0.475934	0.651462	0.910681	0.575589	0.323196	0.725458	0.207696	0.41955	0.0854841	0.5149	0.22951	0.634079	0.50878	0.45303	0.619053	0.331375	0.880066	0.593985	2.12343	0.553817	0.00480845	0.356002	1.21628	0.638927	0.337956	0.829156	0.495153	0.822039	1.85813	0.783329	0.725206	0.984456	0.916398	0.622076	0.725295
A	Norway	Glen Ample	0.171806	0.236057	0.231133	0.255221	0.190057	0.214069	0.539816	0.534033	0.734004	0.18304	0.89146	0.221792	0.391576	0.352301	0	0.491795	0.21508	0.305456	0.277955	0.359484	0.142828	0.602111	0.173532	0.453905	0.344742	0.496824	0.66302	0.27671	0.251632	0.807881	0.540855	0.334582	0.00329106	0.618407	1.32422	0.661865	0.289564	0.418412	0.146463	0.85242	0	0.863691	0.599281	1.84008	1.7795	0.972621	1.1406
A	Norway	Glen Ample	0.233536	0.252324	0.335452	0.187853	0.289736	0.323138	0.554595	0.967125	0.625617	0.28065	0.905465	0.379146	0.55494	0.585432	0	0.310586	0.207802	0.359121	0.733663	0.480178	0.287723	0.546195	0.307502	0.417962	0.305429	0.346738	0.584314	0.309893	0.231977	0.717296	1.29645	0.324966	0.00489679	0.530838	1.08506	0.738579	0.336697	0.409084	0.282561	0.863788	0	1.51329	0.645678	2.05655	2.0166	0.897624	1.09516
B	Norway	Glen Ample	0.307917	0.235061	0.29782	0.273459	0.351525	0.489744	0.277585	1.48484	0.83972	0.358349	1.08239	0.392533	0.545471	0.483114	1.60772	0.187558	0.334439	0.241337	0.175292	0.265669	0.0579458	0.663326	0.177749	0.59142	0.507341	0.297843	0.769299	0.258541	0.228418	0.719577	0.912793	0.242767	0.00520255	0.614452	1.27216	0.808659	0.638085	0.355335	0.385698	1.20937	0.722505	0.708565	1.29941	2.7311	2.4871	1.1393	1.33517
B	Norway	Glen Ample	0.0926668	0.13741	0.129352	0.163846	0.176431	0.154819	0.352479	0.516587	0.662712	0.116544	0.667046	0.118684	0.360586	0.295765	0.862686	0.161972	0.217229	0.103052	0.0415716	0.18703	0.0422212	0.580142	0.0854055	0.297433	0.426076	0.270027	0.616717	0.23623	0.0190507	0.753715	0.24724	0.21152	0.00312268	0.365709	1.07194	0.650643	0.31916	0.240195	0.380701	0.864066	0	0.601085	1.05924	1.79942	1.81315	0.668608	1.02361
B	Norway	Glen Ample	0.139259	0.169983	0.1588	0.190364	0.228792	0.177108	0.504071	0.906196	0.479281	0.140887	0.729363	0.140658	0.54131	0.393707	0	0.217023	0.247221	0.19211	0.0704078	0.260687	0.0639315	0.607153	0.131186	0.296232	0.364614	0.19546	0.630197	0.307072	0.0186407	0.731186	0.548008	0.363514	0.00324305	0.473856	1.35559	0.880398	0.394048	0.467762	0.535888	1.28507	1.79319	0.790757	1.18122	2.52548	2.21642	0.876727	1.26863
A	Norway	Tulameen	0.191843	0.0998825	0.168211	0.15122	0.216396	0.234836	0.456859	1.10389	0.672412	0.184759	0.393829	0.210138	0.34437	0.375896	0.677135	0.221617	0.306405	0.202258	0	0.305375	0.0219438	0.532799	0.138873	0.463898	0.526415	0.266193	0.456	0.161655	0.126634	0.950875	0.323138	0.243285	0.005214	0.573172	0.643556	0.863797	0.248986	0.419362	0.178181	0.93707	1.96245	0.624334	1.35108	1.69944	1.56886	0.95716	1.03971
A	Norway	Tulameen	0.161066	0.0599625	0.179805	0.150129	0.241387	0.20324	0.511843	0.957789	0.551604	0.19493	0.343439	0.207345	0.217954	0.30225	0	0.19122	0.203591	0.190457	0.0837779	0.328221	0.0783275	0.527549	0.140724	0.363437	0.483802	0.278024	0.426344	0.141917	0.062739	0.902185	0.498912	0.237756	0.00566354	0.466661	0.559517	0.847804	0.33523	0.352159	0.281687	0.59119	1.02497	0.827563	1.09294	1.04144	1.11116	0.555089	0.732954
A	Norway	Tulameen	0.20808	0	0.167976	0.170703	0.196153	0.215789	0.501969	0.733104	0.56907	0.190249	0.573063	0.184938	0.553288	0.300025	0.676257	0.430706	0.209593	0.253125	0.27569	0.313245	0.142128	0.682868	0.196726	0.386078	0.485986	0.25269	0.561537	0.172627	0.0751272	0.803343	0.20991	0.452531	0.00499282	0.576684	0.841762	1.06388	0.309408	0.530361	0.273452	0.689079	0.689907	0.986881	1.11695	1.64781	1.59188	1.06671	1.14689
B	Norway	Tulameen	0.170269	0.118679	0.159608	0.215332	0.211304	0.216499	0.414298	0.584445	0.622312	0.171673	0.55526	0.191663	0.357849	0.278891	0.532894	0.313468	0.320576	0.185789	0.0812328	0.245995	0.0458533	0.651316	0.119106	0.350789	0.552154	0.330254	0.583971	0.263863	0.140126	0.9202	0.373704	0.209945	0.00454362	0.392188	0.612818	1.17114	0.470353	0.303877	0.346903	0.744609	1.20811	0.742631	1.7549	2.44392	2.10857	1.31716	1.41834
B	Norway	Tulameen	0.119329	0.0627428	0.139057	0.204347	0.2079	0.186957	0.525703	0.655926	0.398682	0.134589	0.456684	0.156667	0.386765	0.260346	0	0.231536	0.223022	0.123466	0.13411	0.277709	0.0669355	0.595223	0.12329	0.2844	0.487331	0.313536	0.538467	0.166228	0.0527916	0.947266	0.312439	0.164639	0.00477048	0.483932	0.600266	1.09285	0.38636	0.421683	0.356191	0.827699	0.447606	0.947244	1.58848	1.00712	1.05215	0.542048	0.834521
B	Norway	Tulameen	0.150128	0.106169	0.149503	0.297207	0.175754	0.164805	0.396959	0.412346	0.498559	0.117588	0.558557	0.140091	0.536845	0.155369	0	0.426336	0.21168	0.160025	0.169071	0.261454	0.108945	0.619289	0.128028	0.223294	0.437938	0.221175	0.511009	0.119559	0.0311223	0.539148	0.180856	0.379712	0.00345357	0.40865	0.660772	1.04108	0.387783	0.440363	0.533074	0.546218	1.09789	0.99021	1.19661	1.14015	1.11165	0.845702	1.01959
A	Norway	Schönemann	0.510216	0.358583	0.359202	0.26034	0.268806	0.596161	0.975626	1.5769	0.67262	0.439092	1.00187	0.562015	0.697392	1.05804	0.826933	0.317066	0.375619	0.337071	0.141747	0.44189	0.0959664	0.574685	0.313245	0.523318	0.574205	0.134567	0.839233	0.425375	0.654991	1.01763	1.74823	0.279028	0.0062116	0.595784	1.13172	0.793968	0.765996	0.521887	0.567534	2.07863	0.624534	0.14118	0.467584	2.94375	2.57322	1.02647	0.726738
A	Norway	Schönemann	0.493519	0.458315	0.424818	0.174797	0.365811	0.530213	0.815395	0.696839	0.39493	0.44791	0.992435	0.59754	0.669334	0.921393	1.23195	0.371856	0.232968	0.407063	0.631376	0.504997	0.25743	0.479989	0.337005	0.437888	0.423065	0.127775	0.714213	0.476275	0.617823	0.79288	0.871644	0.314592	0.00600976	0.492415	0.774121	0.59326	0.747521	0.364842	0.789447	1.34913	0	0.127503	0.319462	1.84409	1.89599	0.742331	0.600226
A	Norway	Schönemann	0.794567	0.525859	0.645782	0.173953	0.694074	0.541386	1.10878	1.2114	0.478232	0.524009	1.04474	0.78122	0.71558	0.869463	0.756986	0.374564	0.278332	0.508223	1.55789	0.734863	0.502835	0.435981	0.451147	0.475059	0.369227	0.107248	0.679998	0.777344	0.570413	0.51159	1.33149	0.476338	0.00610788	0.375445	1.00278	0.590122	1.20734	0.573191	1.37452	1.45655	0.759606	0.125358	0.264104	2.05966	2.04492	0.96588	0.809396
B	Norway	Schönemann	0.238948	0.20641	0.189023	0.177728	0.162477	0.274342	0.714527	0.936664	0.803684	0.175915	0.6992	0.244707	0.324635	0.444584	0.73622	0.271215	0.287677	0.159776	0.0998275	0.228017	0.0692329	0.4368	0.143293	0.303882	0.403323	0.0685938	0.683174	0.263722	0.218107	0.656017	0.633405	0.274066	0.00278518	0.273601	0.641798	0.59929	0.31969	0.276772	0.187716	1.65357	0.626989	0.0959949	0.479373	2.17639	1.7743	0.848921	0.734172
B	Norway	Schönemann	0.148199	0.386671	0.145091	0.173064	0.0921764	0.20498	0.659826	0.303561	0.412141	0.117397	0.755615	0.159074	0.410632	0.326262	0.724847	0.425477	0.209891	0.147777	0.247545	0.256278	0.108813	0.377164	0.11388	0.213341	0.346593	0.0822768	0.619126	0.372893	0.148369	0.685893	0.470209	0.228	0.00220747	0.291476	0.597169	0.555472	0.379917	0.349831	0.592116	1.32343	0.511819	0.193883	0.348511	0.988702	0.914823	0.469346	0.348795
B	Norway	Schönemann	0.301788	0.331111	0.285075	0.253063	0.275256	0.310765	0.916048	0.774474	0.523747	0.180175	0.794432	0.243819	0.537963	0.519274	0	0.396006	0.267762	0.178923	0.38827	0.332723	0.178758	0.454793	0.18791	0.232415	0.444804	0.0962799	0.721941	0.535269	0.112638	0.732318	0.469435	0.374265	0.00345021	0.339926	0.94495	0.766071	0.715499	0.428228	1.23141	2.47926	0.45116	0.248683	0.452942	2.46367	2.15078	0.961116	0.80354
A	Norway	Veten	0.181547	0.152905	0.101392	0.180375	0.115854	0.282517	0.475411	0.80465	0.445178	0.139495	0.680618	0.271431	0.384533	0.908881	0	0.242869	0.422847	0.283233	0.254225	0.284696	0.0626215	0.349218	0.165317	0.415662	0.441631	0.196901	0.494227	0.350129	0.437947	0.828647	1.46347	0.447346	0.00376834	0.394087	1.00715	0.632637	0.399668	0.477874	0.226266	1.69731	0.950987	0.505269	0.407893	1.64514	1.32346	0.928423	0.589728
A	Norway	Veten	0.229965	0.127877	0.181219	0.209591	0.217568	0.343445	0.470162	1.46605	0.505438	0.180048	0.609662	0.362905	0.459145	0.788498	0.938985	0.183093	0.367612	0.294467	0.545442	0.304449	0.189595	0.357509	0.217021	0.32661	0.388248	0.190541	0.435223	0.32111	0.433684	0.645336	2.04099	0.327455	0.0058294	0.257127	0.845138	0.472303	0.487844	0.344566	0.477494	1.8541	0.975901	0.451437	0.374177	1.43972	1.27099	0.712374	0.657112
A	Norway	Veten	0.213639	0.139928	0.153106	0.18491	0.174103	0.288813	0.549178	0.788862	0.742347	0.167231	0.729358	0.314439	0.728957	0.862893	0.716833	0.246028	0.365428	0.306778	0.569103	0.399623	0.187369	0.391953	0.196449	0.338071	0.430466	0.176766	0.494545	0.387885	0.226965	0.762352	1.18809	0.580312	0.00568214	0.270302	1.2446	0.723592	0.52231	0.467784	0.636633	1.79759	0.849967	0.556554	0.397152	2.1818	1.84677	0.955766	0.942906
B	Norway	Veten	0.15923	0.154868	0.117206	0.232267	0.0981855	0.237591	0.494072	0.953064	0.617267	0.118079	0.699185	0.191645	0.55948	0.711104	0.525836	0.2312	0.385556	0.130945	0.0577548	0.202555	0.0593854	0.400272	0.104954	0.268976	0.350391	0.0942242	0.622433	0.183957	0.115736	0.984528	0.672429	0.276645	0.00408947	0.34356	0.725413	0.741107	0.387578	0.304333	0.33696	2.66616	1.60264	0.105272	0.724745	2.64086	2.02785	0.909222	0.874191
B	Norway	Veten	0.158628	0.0776022	0.156346	0.227376	0.232886	0.267545	0.492605	2.2998	0.509474	0.1198	0.386686	0.221569	0.315395	0.953327	0.393978	0.124975	0.329607	0.143061	0.103796	0.185306	0.127243	0.395425	0.141704	0.24913	0.367258	0.0901028	0.53759	0.243581	0.0666527	0.653778	1.32378	0.298073	0.0063635	0.266905	0.861314	0.660238	0.495807	0.296513	0.488591	2.73001	2.16906	0.382659	0.751084	1.99595	1.65589	0.562137	0.713375
B	Norway	Veten	0.43625	0	0.50709	0.260855	0.836001	0.493346	0.77725	5.52921	0.644698	0.218646	0.573375	0.479341	0.572075	1.16807	0	0.157087	0.463931	0.268458	0.421332	0.352947	0.323711	0.438466	0.282927	0.265824	0.424241	0.130433	0.595263	0.640144	0.129029	0.7573	1.50933	0.638372	0.00758074	0.302158	1.32511	0.969485	1.02638	0.435637	0.93202	2.52063	1.19952	0.3218	0.839218	2.53874	1.94693	0.867786	1.00664
A	Germany	Glen Ample	0.531922	0.512097	0.513487	0.227879	0.450691	0.57252	0.626835	0.642646	0.629602	0.612175	1.10341	0.704637	0.618246	1.03819	1.65182	0.441501	0.197091	0.639524	0.483805	0.419932	0.146978	0.573033	0.376236	0.92896	0.778786	0.487576	0.766716	0.363603	0.986044	0.612558	0.63972	0.541836	0.00431039	0.452855	1.26203	0.365867	0.370773	0.464568	0.301157	0.144255	0	0.19469	0.515412	1.46149	1.38566	0.948733	1.25297
A	Germany	Glen Ample	0.54452	0.574627	0.550659	0.235174	0.469799	0.596688	0.883569	0.728274	0.718244	0.614837	1.45738	0.706559	0.803684	1.12953	1.41029	0.514056	0.274158	0.575466	1.01113	0.560541	0.361658	0.653993	0.449647	0.841136	0.595504	0.57509	0.858548	0.224696	0.583825	0.679111	0.740532	0.480508	0.00568305	0.565863	1.30806	0.470069	0.467129	0.512678	0.498418	0.365138	0	0.282395	0.538926	0.928279	0.932307	0.514726	0.713596
A	Germany	Glen Ample	0.610054	0.639433	0.56342	0.299264	0.523883	0.545788	0.910148	0.833407	1.45086	0.524729	1.34077	0.58424	0.463486	0.912964	1.13174	0.435786	0.232025	0.437396	0.893397	0.501468	0.234659	0.719385	0.362346	0.615938	0.516998	0.485753	0.829081	0.394796	0.23653	0.641597	0.424671	0.664866	0.00499164	0.537261	1.5636	0.451768	0.388489	0.481494	0.712626	0.550687	1.31776	0.313832	0.653763	1.52794	1.63228	0.856647	1.11619
B	Germany	Glen Ample	0.572027	0.760709	0.551634	0.217724	0.438703	0.641599	0.637976	0.694661	0.978206	0.549644	1.51536	0.696956	0.958115	0.850353	1.10217	0.505377	0.318834	0.66829	0.746389	0.313708	0.263734	0.509688	0.42655	0.865794	0.509787	0.544007	0.682576	0.238454	1.07604	0.395274	0.372904	0.452754	0.00351015	0.414108	1.36524	0.250771	0.438087	0.477114	0.53763	0.837067	0	0.18952	0.566589	1.49573	1.51004	1.07729	1.31815
B	Germany	Glen Ample	0.322689	0.38248	0.377885	0.257341	0.321213	0.418428	0.800922	0.523065	0.848348	0.334177	1.35854	0.374969	0.736207	0.593834	0.948527	0.453512	0.24052	0.35516	0.410295	0.247608	0.17931	0.613444	0.269117	0.507996	0.548758	0.592181	0.746739	0.193168	0.190319	0.601574	0.219649	0.426921	0.00335972	0.532585	1.3096	0.27849	0.358608	0.411964	0.373641	0.451072	0	0.202975	0.712635	1.4778	1.50009	0.748748	1.07796
B	Germany	Glen Ample	0.314362	0.286274	0.305188	0.203244	0.208363	0.360608	0.624681	0.493486	0.615188	0.262084	1.03294	0.329838	0.62474	0.676356	0.784958	0.378208	0.139909	0.369732	0.396866	0.279417	0.346145	0.608392	0.307762	0.374702	0.331218	0.534328	0.638868	0.347548	0.123342	0.46052	0.229573	0.416841	0.00343635	0.432492	1.35059	0.33559	0.414735	0.593185	0.338184	1.01939	0	0.204843	0.525884	1.59954	1.73363	0.717761	1.54661
A	Germany	Tulameen	0.424037	0.241624	0.309568	0.200038	0.350236	0.471943	0.579136	0.504564	0.562894	0.362124	0.765698	0.437119	0.439705	0.750482	0.928323	0.358659	0.227753	0.341887	0.216517	0.379574	0.111439	0.499371	0.291735	0.754425	0.463564	0.45571	0.579504	0.222309	0.308143	0.747232	0.301081	0.410467	0.0054656	0.483576	0.503826	0.455755	0.40198	0.472047	0.287039	0.517242	0.808645	0.212164	0.825228	1.46411	1.41267	1.06255	1.39286
A	Germany	Tulameen	0.339109	0.206904	0.292554	0.261909	0.30884	0.446997	0.656125	0.466903	0.434163	0.32192	0.805184	0.374907	0.488722	0.644293	0.807035	0.342401	0.204695	0.288334	0.22893	0.389528	0.177258	0.571461	0.292464	0.589215	0.521609	0.498387	0.602784	0	0.136099	0.950719	0.187643	0.407384	0.00564169	0.482885	0.510763	0.619433	0.358228	0.461327	0.308497	0.619358	0.76967	0.235062	1.03813	0.950802	1.00356	0.588602	0.967968
A	Germany	Tulameen	0.508967	0.236458	0.32918	0.276861	0.313979	0.508318	0.687118	0.473026	0.478558	0.368313	0.836068	0.451437	0.830154	0.685826	0.801297	0.565348	0.265056	0.368625	0.46513	0.408975	0.280087	0.571933	0.37863	0.49195	0.499786	0.388502	0.612356	0.171206	0.143228	0.684143	0.306644	0.54911	0.00580831	0.515689	0.633127	0.49425	0.511596	0.469041	0.627514	0.324797	0	0.269055	0.693596	1.2543	1.35745	0.939507	1.21505
B	Germany	Tulameen	0.574874	0.12715	0.382374	0.24185	0.367695	0.66431	0.455636	0.615535	0.493636	0.463609	0.71596	0.530359	0.587433	0.940046	0.871294	0.288926	0.296671	0.387032	0.292099	0.389548	0.27539	0.548473	0.387426	0.540402	0.519567	0.678506	0.56618	0.264764	0.401413	0.458765	0.378451	0.380926	0.00518655	0.397328	0.481591	0.337805	0.454633	0.385948	0.371217	0.495632	0.387236	0.234841	0.701244	1.07822	1.04738	0.71544	1.11143
B	Germany	Tulameen	0.421493	0.170016	0.336263	0.338442	0.366584	0.518492	0.565326	0.607325	0.647095	0.331806	0.749665	0.397105	0.491624	0.854634	1.09681	0.301644	0.304332	0.332752	0.267233	0.342881	0.238822	0.566345	0.328785	0.46436	0.495222	0.671331	0.573338	0.219875	0.152822	0.578934	0.278388	0.376722	0.00519399	0.399405	0.502833	0.38748	0.499301	0.389096	0.504504	0.623308	0.748296	0.256496	0.823758	1.18935	1.23529	0.648606	1.08342
B	Germany	Tulameen	0.714473	0.319794	0.332625	0.283477	0.401489	0.607966	0.671603	0.512166	0.775254	0.42818	0.994489	0.482448	0.892644	0.910572	0.696563	0.56164	0.381684	0.459315	0.485659	0.423266	0.617782	0.575332	0.481674	0.473821	0.486504	0.517735	0.554273	0.313445	0.15589	0.362366	0.324827	0.615367	0.0067264	0.494093	0.590922	0.306037	0.639761	0.434544	1.0379	0.665265	0	0.342132	0.409744	0.807143	0.770965	0.603231	0.939133
A	Germany	Schönemann	0.450631	0.246152	0.360067	0.541522	0.232048	0.525737	0.842413	0.573235	0.822515	0.36994	0.888565	0.461217	0.528926	0.911882	1.06203	0.459565	0.429271	0.264594	0.261771	0.374494	0.173247	0.423896	0.312153	0.515952	0.52166	0.178972	0.820969	0.403542	0.417742	0.945284	0.564302	0.262873	0.00373448	0.449665	0.536086	0.646986	0.538377	0.413476	0.180451	2.6815	0	0.0439616	0.400986	3.13761	2.70777	1.07478	0.908775
A	Germany	Schönemann	0.297117	0.179608	0.247654	0.223964	0.159524	0.389652	0.778964	0.556843	0.428089	0.256377	0.801926	0.33907	0.409713	0.847783	0.858841	0.357889	0.263162	0.207025	0.334936	0.359417	0.242018	0.425397	0.281271	0.419033	0.436278	0.195338	0.766606	0.368878	0.180535	0.93525	0.343525	0.328474	0.00296785	0.399958	0.482754	0.576473	0.419684	0.452222	0.227788	2.26495	1.60704	0.0680711	0.374625	2.01158	1.93418	0.583341	0.760911
A	Germany	Schönemann	0.390215	0.425588	0.313956	0.238221	0.21777	0.41495	1.01395	0.628874	0.504986	0.278502	0.853419	0.356845	0.410713	0.768326	0	0.379235	0.266769	0.217734	0.498291	0.423362	0.29795	0.468925	0.336372	0.396857	0.604318	0.18386	0.81423	0.401899	0.111648	1.06995	0.40019	0.434493	0.0036035	0.466821	0.747584	0.770213	0.671811	0.648629	0.789323	2.54427	1.1372	0.0615622	0.38746	2.20677	2.18588	0.644217	0.886322
B	Germany	Schönemann	0.436536	0.310906	0.306402	0.295019	0.225912	0.496472	0.802695	0.507491	0.446096	0.311789	0.938717	0.425229	0.613538	0.950015	2.31381	0.316044	0.291298	0.234024	0.15236	0.305916	0.215145	0.50708	0.316001	0.511079	0.515639	0.224373	0.825991	0.433816	0.296898	0.908836	0.528492	0.331791	0.00339523	0.404029	0.728635	0.661835	0.507364	0.390876	0.454393	2.98189	0	0.105793	0.65346	2.76715	2.59836	0.689755	1.20696
B	Germany	Schönemann	0.409524	0.240831	0.314318	0.197484	0.201018	0.502533	0.662201	0.530268	0.406236	0.329717	0.723925	0.454035	0.369301	1.1297	1.17289	0.241849	0.192853	0.239385	0.506552	0.332941	0.383823	0.455671	0.38374	0.381204	0.429661	0.202256	0.731937	0.420522	0.201409	0.945857	0.510265	0.239885	0.00298106	0.35551	0.585334	0.586279	0.551557	0.404938	0.407453	2.46628	0	0.0867762	0.480405	2.64034	2.37606	0.571571	1.32258
B	Germany	Schönemann	0.267964	0.290898	0.223025	0.223351	0.203131	0.364926	0.888407	0.435991	0.435011	0.202064	0.803044	0.265546	0.376687	0.941825	0.821033	0.322784	0.219215	0.155635	0.190798	0.243337	0.289722	0.500777	0.266675	0.259686	0.448267	0.174007	0.774434	0.421698	0.0445364	0.849566	0.257208	0.491463	0.00290111	0.365333	0.913884	0.708002	0.530097	0.480907	0.850304	3.41637	1.18196	0.0584431	0.443807	1.90929	1.91164	0.460292	0.764638
A	Germany	Veten	0.343344	0.249854	0.297965	0.217381	0.411952	0.539996	0.685927	0.204387	0.913644	0.263145	1.09105	0.433652	0.840134	0.609287	1.22134	0.361689	0.210582	0.286475	0.12828	0.354912	0.0907191	0.473386	0.187681	0.358018	0.500798	0.21383	0.626015	0.542364	0.295808	0.570147	0.548327	0.559892	0.00520105	0.32719	1.11942	0.447121	0.687413	0.273711	1.28523	0.644219	0	0.239416	0.276474	1.24499	0.942472	0.826627	0.517134
A	Germany	Veten	0.305223	0.280109	0.339767	0.221649	0.489038	0.558072	0.568584	0.20103	0.794184	0.27756	1.11945	0.438517	0.93604	0.586844	0.57381	0.415243	0.197624	0.348164	0.550219	0.359383	0.182118	0.476979	0.20836	0.325987	0.473285	0.249979	0.615757	0.566717	0.288838	0.361647	0.441978	0.556106	0.0044642	0.322793	1.13241	0.381724	0.662058	0.298756	1.15222	0.746756	0	0.192584	0.249053	0.999395	0.801967	0.662306	0.646074
A	Germany	Veten	0.423122	0.366405	0.269438	0.207925	0.375298	0.509483	0.798061	0.212623	0.785692	0.232471	1.05526	0.385986	0.703149	0.63184	1.05456	0.424884	0.209189	0.267499	0.371599	0.38842	0.278784	0.449125	0.246069	0.278735	0.505051	0.225368	0.58663	0.45927	0.10932	0.530058	0.479855	0.482163	0.00520389	0.299832	1.23248	0.671892	0.818599	0.393449	1.11329	0.545232	0	0.2392	0.24737	1.39987	1.20499	0.849591	0.729106
B	Germany	Veten	0.189792	0.25505	0.125685	0.242872	0.127798	0.306018	0.562788	0.195273	0.520912	0.147325	0.767517	0.211719	0.831683	0.48686	0.839831	0.302816	0.215737	0.16972	0.0685285	0.226379	0.0550823	0.420946	0.126809	0.416168	0.450995	0.224934	0.581695	0.183414	0.114616	0.689902	0.345668	0.391538	0.00334282	0.25538	1.00471	0.362809	0.352303	0.344934	0.276702	1.69765	0	0.181657	0.37018	2.10853	1.83772	1.0984	0.940526
B	Germany	Veten	0.2256	0.278006	0.193999	0.181271	0.250701	0.413376	0.513117	0.258687	0.448991	0.205908	0.930169	0.38163	0.85034	0.388061	0.761107	0.27833	0.225691	0.268779	0.512717	0.289918	0.222126	0.383318	0.264609	0.348163	0.437912	0.25591	0.522799	0.428341	0.197198	0.684318	0.529324	0.379688	0.00452414	0.202168	0.88101	0.350646	0.530034	0.302895	0.566802	1.49753	0	0.177467	0.351141	1.91836	1.75456	0.90183	0.992723
B	Germany	Veten	0.0937189	0.139587	0.11216	0.231162	0.118575	0.30165	0.497816	0.198948	0.695382	0.127846	0.806346	0.218799	0.741478	0.421847	0	0.20588	0.163529	0.156175	0.25908	0.167776	0.0544601	0.371203	0.354975	0.0778473	0.417026	0.175999	0.51369	0.281786	0.0217673	0.607627	0.624433	0.525783	0.00327155	0.152603	0.939563	0.391729	0.424334	0.293032	0.387017	1.73339	0	0	0.390422	1.639	1.62962	0.695571	0.854799
A	Poland	Glen Ample	0.682589	0.65729	0.648372	0.292555	0.572007	0.663758	0.85792	1.25414	1.2563	0.595405	1.5632	0.777307	0.969818	1.07987	0.77696	0.391114	0.430138	0.433125	0.437871	0.455726	0.151848	0.659495	0.37222	0.859563	0.549638	0.257836	0.731783	0.607425	0.476996	0.33367	0.516965	0.46227	0.347892	0.599054	1.16209	0.477734	0.501641	0.337401	0.36581	0.751597	0	1.50313	0.688027	2.08392	1.92692	1.03469	1.26269
A	Poland	Glen Ample	0.548119	0.318849	0.549069	0.313453	0.34992	0.554549	0.828576	3.14773	0.720984	0.537677	1.05597	0.626297	0.667078	1.48875	1.02549	0.401461	0.418513	0.487485	0.809128	0.271264	0.481306	0.548758	0.466356	0.669571	0.50287	0.297425	0.717283	0	0.299468	0.529089	0.512116	0.346298	0.316049	0.581699	0.729576	0.504624	0.347099	0.387602	0.12517	1.69008	1.22981	1.04191	0.605929	1.94112	1.96173	0.723058	1.47281
A	Poland	Glen Ample	0.697669	0.502227	0.543868	0.315433	0.588595	0.603502	0.861219	1.95164	0.78345	0.594879	1.34013	0.692488	0.858689	1.23151	0.802585	0.522575	0.292755	0.486274	0.583117	0.507468	0.516543	0.550157	0.451687	0.525476	0.45978	0.193358	0.657729	0.456616	0.131726	0.429189	1.82306	0.408621	0.294319	0.596793	0.786464	0.90329	0.927254	0.450471	0.577363	1.03214	0.886808	1.19961	0.700847	2.10651	1.96249	0.765816	1.11404
B	Poland	Glen Ample	0.478796	0.58817	0.52446	0.293955	0.545476	0.559427	0.866248	1.1079	1.06555	0.540939	1.43655	0.683855	0.81877	0.848459	1.4002	0.480987	0.379968	0.567143	0.552012	0.671979	0.323948	0.697784	0.426345	0.752109	0.592552	0.293783	0.844109	0.498222	0.463769	0.645764	3.30469	0.40532	0.333885	0.806721	0.8939	0.71412	0.806809	0.448951	0.491864	1.46814	0.916275	1.28926	0.843753	2.19221	2.09523	1.14515	1.96981
B	Poland	Glen Ample	0.320311	0.683533	0.398478	0.242451	0.377238	0.42265	0.888686	2.44081	0.688128	0.371842	1.23401	0.49725	0.926763	0.828793	0.551786	0.727701	0.268697	0.41523	0.385445	0.374072	0.38103	0.564051	0.395058	0.411445	0.54725	0.225947	0.597154	0.341889	0.134296	0.715515	0.593117	0	0.267819	0.651597	0.803909	0.796165	0.399966	0.345431	0.182549	0.788645	1.21758	1.25764	0.737627	3.26822	2.78469	1.22739	1.52082
B	Poland	Glen Ample	0.393528	0.650724	0.417799	0.214576	0.449174	0.403337	0.717478	1.04241	1.12535	0.358706	1.77594	0.493585	0.918863	0.911955	0.720239	0.921769	0.194189	0.311948	0.685346	0.417323	0.547199	0.51132	0.351013	0.362781	0.383314	0.259591	0.579669	0.518403	0.12114	0.475495	0.371569	0	0.244488	0.58745	0.665841	0.646895	0.525973	0.335933	0.421132	0.648724	0.734778	0.968897	0.544582	2.04877	1.85773	0.653406	1.11563
A	Poland	Tulameen	0.241819	0.26095	0.249183	0.251313	0.268947	0.300652	0.584182	0.683775	0.679018	0.190502	1.06242	0.270303	1.03389	0.447327	0	0.699583	0.158502	0.254285	0.0619282	0.262486	0.141343	0.584818	0.199692	0.431734	0.59653	0.193352	0.53332	0.294766	0.128625	0.692202	0.163164	0.279685	0.471537	0.817491	0.460188	1.08094	0.297202	0.299786	0.22445	0.510503	0.798109	1.25967	0.961916	2.08441	1.98378	0.943386	1.21742
A	Poland	Tulameen	0.161396	0.201436	0.153136	0.237843	0.11798	0.218698	0.631447	0.627974	0.795337	0.141842	0.947478	0.179884	0.815988	0.449594	0.488585	0.573159	0.171418	0.257212	0.102902	0.262749	0.12647	0.578295	0.176098	0.330531	0.517407	0.180949	0.554066	0.308399	0.0327389	0.740566	0.236217	0.300819	0.465253	0.640765	0.463094	1.06622	0.235873	0.297331	0.100741	0.79295	0.949769	1.27578	1.02913	1.77803	1.74656	0.742277	1.12719
A	Poland	Tulameen	0.308337	0.237599	0.214979	0.211133	0.221493	0.319256	0.7272	0.762272	0.87014	0.208896	1.02975	0.247973	0.833547	0.309607	0	0.809091	0.240149	0.227393	0.0970503	0.287992	0.321549	0.678394	0.275632	0.273225	0.457599	0.190708	0.58674	0.426365	0.0305931	0.570991	0.349768	0	0.583497	0.63433	0.524141	1.31429	0.61552	0.475278	0.69024	0.657365	0.695353	1.17245	0.727031	1.60102	1.64681	0.809014	1.14213
B	Poland	Tulameen	0.454984	0.170458	0.320874	0.259051	0.285246	0.434893	0.64529	2.48899	0.767312	0.299664	0.94644	0.383332	0.718815	0.76283	0.776778	0.49721	0.291177	0.358796	0.18358	0.320513	0.171049	0.515288	0.259166	0.517507	0.512088	0.196491	0.468841	0.174401	0.167485	0.583548	0.394075	0.283644	0.435312	0.627637	0.439117	1.01498	0.32053	0.35877	0.157001	0.584914	0	0.872588	0.891739	2.44254	2.29683	1.05399	1.34242
B	Poland	Tulameen	0.352183	0.117428	0.348725	0.216218	0.389338	0.38052	0.591952	1.88908	0.536581	0.291141	0.896375	0.399664	0.811947	0.608468	0	0.482817	0.229003	0.381869	0.19166	0.343171	0.310576	0.515088	0.310095	0.389423	0.471324	0.181813	0.480933	0.286135	0.0689071	0.562611	0.339801	0.252175	0.401783	0.60215	0.400399	0.945735	0.383594	0.381536	0.273816	0.585071	0.49181	0.809304	0.973066	2.32546	2.13812	0.866927	1.26411
B	Poland	Tulameen	0.788104	0.190434	0.527132	0.223642	0.658388	0.672091	0.805744	6.47972	0.568542	0.533442	0.996429	0.64966	0.83797	1.06906	0.574483	0.664744	0.513331	0.444098	0.330658	0.521411	0.718171	0.646138	0.517243	0.414014	0.6198	0.210261	0.457239	0.193512	0.0861134	0.475735	0.667942	0	0.574266	0.643062	0.625413	1.58881	0.593696	0.482336	0.40992	0.67467	0.397342	0.998429	0.93484	1.88241	1.8935	0.725864	1.26388
A	Poland	Schönemann	0.563041	0.494888	0.438899	0.269175	0.355341	0.532926	0.987014	0.653399	0.943551	0.456694	1.1823	0.668679	0.888055	1.05028	1.3652	0.459621	0.446336	0.348581	0.349399	0.344009	0.202394	0.39498	0.26006	0.399957	0.481469	0.0575173	0.657848	0.602774	0.335061	0.354448	0.932075	0.388645	0.157777	0.371206	0.590993	0.375611	0.596618	0.224843	0.415505	1.35798	0.507835	0.0786392	0.185929	2.03784	1.89097	0.735462	0.555653
A	Poland	Schönemann	0.442484	0.386295	0.36198	0.286114	0.255029	0.481655	1.16345	0.627971	0.752753	0.384049	1.1063	0.536623	0.891212	1.33286	0.893221	0.400365	0.406281	0.236805	0.330032	0.306018	0.231943	0.444811	0.240735	0.300363	0.415956	0.0477061	0.749113	0.377599	0.126866	0.445846	0.827956	0.310942	0.19709	0.572482	0.56055	0.508538	0.478977	0.265063	0.343323	1.70979	0.571176	0.0909693	0.303385	3.08877	2.61996	0.906876	0.518035
A	Poland	Schönemann	0.234759	0.628803	0.208823	0.23774	0.141007	0.275029	1.59883	0.376888	0.562431	0.199425	1.10046	0.245479	0.715071	0.984387	0	0.877767	0.197934	0.19716	0.107603	0.314431	0.177834	0.541951	0.189849	0.223264	0.438077	0.0629296	0.931952	0.228381	0.034655	0.76507	0.498754	0	0.247825	0.655744	0.780282	0.767184	0.552081	0.402286	0.295962	2.79974	0	0.170002	0.402819	3.07137	2.63793	0.889448	0.611503
B	Poland	Schönemann	0.60179	0.794346	0.474184	0.240484	0.559605	0.611024	1.00502	0.631846	0.791913	0.432926	1.57231	0.646101	1.17297	1.09511	0.882256	0.819815	0.275169	0.33075	0.354531	0.486058	0.298949	0.390748	0.332476	0.371079	0.403343	0.138343	0.670338	1.00529	0.383724	0.434446	0.607844	0.281585	0.136329	0.532311	0.442477	0.407321	0.616116	0.276767	0.354734	2.03983	0.974188	0.0929006	0.292578	2.02832	1.89306	0.748445	0.688369
B	Poland	Schönemann	0.55617	0.57988	0.485403	0.209417	0.540796	0.57631	1.15377	0.936881	0.678745	0.452864	1.11866	0.678153	0.755007	1.336	0.802478	0.564466	0.294948	0.4218	0.584594	0.433255	0.407945	0.474738	0.390471	0.435991	0.460914	0.0583246	0.840338	0.750189	0.221824	0.445299	0.71959	0.325956	0.207955	0.501385	0.518081	0.555287	0.858331	0.279647	0.754134	1.72714	0.41237	0.0905125	0.243618	2.26162	2.07701	0.845841	0.577317
B	Poland	Schönemann	1.21486	0.571812	1.003	0.313744	1.42565	0.959868	1.76316	4.90618	0.928068	0.676086	1.38526	1.05635	1.15014	2.07318	0.903882	0.975294	0.39674	0.424037	0.514888	0.638192	0.893033	0.505271	0.591359	0.348411	0.46417	0.0743435	0.8626	1.29183	0.102737	0.483847	0.830851	0	0.246524	0.628319	0.65999	0.68923	1.48487	0.512992	1.0114	2.12867	0.801849	0.122113	0.244494	3.20913	2.72444	1.11218	0.774421
A	Poland	Veten	0.510742	0.391997	0.549064	0.240573	0.807954	0.611755	0.772297	1.18616	0.803003	0.40966	1.15235	0.69115	0.967143	1.04697	0.741705	0.449762	0.469835	0.438565	0.258545	0.380467	0.214488	0.440851	0.28848	0.399433	0.587231	0.104069	0.601702	0.831878	0.387536	0.288049	0.773012	0.605019	0.348644	0.337795	1.0351	0.266894	0.867344	0.234461	0.768147	0.979226	0.756676	0.340593	0.260905	1.11092	0.828594	0.720452	0.707724
A	Poland	Veten	0.372203	0.413607	0.267662	0.264841	0.33979	0.492438	0.845045	2.51757	0.791586	0.291831	1.21048	0.50532	0.885106	1.28906	1.32733	0.394297	0.481222	0.344593	0.36644	0.241385	0.302833	0.370177	0.313655	0.378501	0.538534	0.101183	0.589047	0.31679	0.140016	0.390218	0.576628	0.558243	0.309871	0.35997	0.618813	0.451403	0.46523	0.239219	0.273608	1.12875	0.881915	0.411741	0.313072	1.91465	1.55198	0.985476	0.769907
A	Poland	Veten	0.5388	0.300698	0.295065	0.227758	0.397313	0.546807	0.913412	0.981951	0.845866	0.36078	0.994693	0.626081	0.84944	1.30787	0.789243	0.391554	0.365648	0.385651	0.631204	0.380944	0.422059	0.363338	0.360692	0.288575	0.426032	0.0692732	0.494167	0.461561	0.111767	0.376647	0.859023	0.525571	0.357701	0.40717	0.89864	0.44321	0.863624	0.309906	0.605073	0.892184	0.426638	0.438529	0.279204	1.35783	1.23059	0.645749	0.468461
B	Poland	Veten	0.680777	0.602336	0.821725	0.25775	1.2852	0.815596	0.831894	2.34367	1.13624	0.49592	1.99705	0.926911	1.41742	1.37222	0.914172	0.525505	0.422587	0.49952	0.510498	0.503428	0.413188	0.390519	0.465407	0.542668	0.485863	0.167309	0.620622	1.10954	0.474706	0.331347	1.68762	0.448212	0.304869	0.32792	0.76905	0.412588	1.11801	0.277349	0.767376	1.33471	0.667563	0.377929	0.343966	1.72303	1.47907	0.994718	1.15821
B	Poland	Veten	0.581878	0.367596	0.72564	0.288703	1.15293	0.887748	0.794491	5.78192	0.886345	0.460236	1.7052	0.939785	1.09582	1.67122	0	0.482194	0.377231	0.517758	0.915452	0.463598	0.779513	0.428282	0.668233	0.474271	0.43112	0.214244	0.600126	0.749638	0.302312	0.618277	1.34389	0.441908	0.275464	0.412137	0.758086	0.732316	0.879672	0.30595	0.553651	1.67949	1.44628	0.42392	0.415872	1.4468	1.32191	0.590819	1.22725
B	Poland	Veten	0.730792	0.378928	0.414714	0.31896	0.589859	0.688588	0.975401	1.91848	0.942446	0.485191	1.5323	0.825775	1.23228	1.35704	1.54739	0.443679	0.496615	0.554737	0.710766	0.500113	0.698587	0.416417	0.489034	0.471904	0.521047	0.102871	0.615098	0.55081	0.15904	0.417688	2.00837	0.590386	0.383473	0.423982	0.777968	0.60581	1.22887	0.38521	1.1594	1.6612	0	0.505092	0.340702	1.1418	1.09655	0.547297	1.02004

## Sheet: Table S3
Table S3. Secondary metabolites profiling of raspberry fruits harvested in 2018. Metabolite relative content is shown and represent each biological replicate per harvest date.
Harvest	Location	Genotype	Cyanidin-3-sophoroside	Cyanidin-3-glycosyl-rutinoside	Cyanidin-3-glycoside	Cyanidin-3-xylosyl-rutinoside	Cyanidin-3-rutinoside	Pelargonidin-3-glucoside	Pelargonidin-3-rutinoside	Procyanidin B1	Catechin	Ellagic tannin 1	Ellagic tannin 2	p-Coumaroyl-glucose	p-Coumaroyl-glucose derivate	Unknown flavonol	Ellagic acid	Ellagic acid pentoside	Quercetin-3-glucoside	Quercetin-3-glucuronide	Kaempferol-3-galactoside	Kaempferol-3-glucoside	Ellagic acid derivate	Kaempferol-3-xyloside-glucoside	Ellagic acid rhamnoside	Ellagic acid-4-acetyl-arabinoside	Ellagic acid-4-acetyl-xyloside
A	Germany	Glen_Ample	1.12049	0.60829	0.649232	0.0384359	0.365141	0.0300803	0.0275736	0.365141	0.167948	3.14422	7.66128	0.0284091	0.053476	0.0125334	0.167948	0.193015	0.0660095	0.131183	0.00417781	0.00835563	0.369319	0.122828	0.0576539	0.147895	0.0985964
A	Germany	Glen_Ample	1.41528	0.714888	0.801834	0.0434729	0.45405	0.0386426	0.0338123	0.415408	0.198043	3.38316	7.57974	0.0483032	0.0724549	0.014491	0.188383	0.193213	0.0676245	0.120758	0.00483032	0.00483032	0.352614	0.115928	0.159401	0.101437	0.0627942
A	Germany	Glen_Ample	1.32367	0.73893	0.73893	0.0463411	0.433922	0.0337026	0.0294898	0.371572	0.179467	3.42503	8.06673	0.0463411	0.0623499	0.0168513	0.175254	0.183679	0.0707755	0.125542	0	0.00421283	0.313435	0.0792012	0.104478	0.0463411	0.0294898
B	Germany	Glen_Ample	1.16743	0.64903	0.64903	0.0405127	0.396032	0.0322448	0.0289376	0.358827	0.187681	4.80696	8.63003	0.0363788	0.0694503	0.0165358	0.277801	0.248864	0.0487806	0.0653164	0.0082679	0.00413395	0.358827	0.0735843	0.200083	0.118231	0.094254
B	Germany	Glen_Ample	1.25565	0.633889	0.665422	0.0436607	0.378393	0.0355754	0.0282986	0.311285	0.163323	3.89066	7.38513	0.0355754	0.0598314	0.012128	0.23124	0.187579	0.0396181	0.0557887	0	0.00404266	0.25873	0.0355754	0.139876	0.0873214	0.076002
B	Germany	Glen_Ample	1.00446	0.565196	0.583935	0.0337318	0.368052	0.0299838	0.0262359	0.301338	0.152168	3.55833	6.89703	0.0337318	0.0592181	0.0112439	0.208388	0.178404	0.0412278	0.0517221	0	0.00374798	0.249616	0.0299838	0.13043	0.081706	0.100446
A	Germany	Tulameen	1.95245	0.335645	0.488268	0.0186125	0.152622	0.0217146	0.0155104	0.19295	0.180541	1.96796	7.37675	0.0465312	0.0310208	0.00930625	0.0992667	0.382177	0.0403271	0.0899604	0.00310208	0.0155104	0.354258	0.0930625	0.0341229	0.0217146	0.0155104
A	Germany	Tulameen	1.88332	0.34974	0.495949	0.0193227	0.16231	0.0225431	0.0161022	0.19065	0.181633	2.04498	7.33489	0.0476626	0.0283399	0.00644089	0.0921048	0.400624	0.0444422	0.0921048	0.00322045	0.0161022	0.362622	0.0921048	0.0283399	0.0193227	0.0128818
A	Germany	Tulameen	2.22518	0.368677	0.543175	0.0229603	0.162034	0.0255843	0.0164002	0.246003	0.190898	2.32424	7.84652	0.0518247	0.0321444	0.00984013	0.113489	0.400821	0.0387045	0.074129	0.00656009	0.0131202	0.465766	0.110209	0.0616648	0.0616648	0.0354245
B	Germany	Tulameen	1.95193	0.350234	0.551619	0.0218897	0.179495	0.0281438	0.0187626	0.226402	0.158231	2.43225	7.47375	0.0431539	0.0250167	0.00938128	0.0712977	0.557873	0.0337726	0.0775519	0.00625419	0.0125084	0.449051	0.0869332	0.0712977	0.0587894	0.0337726
B	Germany	Tulameen	1.85026	0.336182	0.50868	0.0220344	0.172498	0.0251822	0.0188866	0.175646	0.138502	2.13356	6.54485	0.0377733	0.0188866	0.00944331	0.0629554	0.471536	0.0251822	0.0566599	0.00314777	0.00944331	0.411729	0.0786943	0.0535121	0.0535121	0.0283299
B	Germany	Tulameen	2.00052	0.324825	0.556555	0.0234409	0.172124	0.0267897	0.0167435	0.208959	0.158729	2.96428	8.00609	0.0428635	0.0267897	0.0100461	0.0763505	0.589372	0.0267897	0.059607	0.00669741	0.0100461	0.519719	0.0696531	0.0696531	0.0663044	0.0301384
A	Germany	Schönemann	1.55786	0.518318	0.923958	0.0363477	0.398371	0.0327129	0.0254434	0.28642	0.141029	0.15993	5.84325	0.0254434	0.0218086	0.00726953	0.12649	0.308228	0.0508867	0.137394	0.00363477	0.061791	0.402005	0	0.0799649	0.0763301	0.0581563
A	Germany	Schönemann	1.45096	0.498834	0.863174	0.0355801	0.382131	0.0355801	0.0249061	0.283218	0.130935	0.119549	4.76276	0.0249061	0.0213481	0.00711603	0.106029	0.254754	0.0462542	0.127377	0.00355801	0.0569282	0.342993	0	0.0740067	0.0640443	0.0498122
A	Germany	Schönemann	1.38483	0.48118	0.788362	0.0386663	0.348712	0.0315059	0.0207652	0.324367	0.128888	1.65477	5.05884	0.0279256	0.0279256	0.00716042	0.111703	0.264936	0.0415304	0.111703	0.00358021	0.0522711	0.335108	0	0.0730363	0.0665919	0.0486909
B	Germany	Schönemann	1.87901	0.610325	1.31594	0.047251	0.622138	0.0669389	0.0433134	0.362257	0.153566	3.20204	6.92069	0.0275631	0.0275631	0.0118127	0.200817	0.385883	0.0433134	0.0905644	0.00393758	0.047251	0.417384	0	0.074814	0.0905644	0.0708765
B	Germany	Schönemann	1.38477	0.46021	0.994248	0.0365684	0.46711	0.0531277	0.0331186	0.280128	0.130404	2.09475	5.31622	0.0200091	0.0200091	0.0068997	0.136614	0.283578	0.0303587	0.0634773	0.0068997	0.0331186	0.303587	0	0.0531277	0.0634773	0.0503678
B	Germany	Schönemann	1.64941	0.500313	1.07662	0.0344801	0.4595	0.0513683	0.0344801	0.28147	0.13018	2.33339	5.29304	0.0239249	0.0239249	0.00703675	0.144253	0.298358	0.0344801	0.08233	0.00351837	0.0408131	0.32932	0	0.0619234	0.0682565	0.0513683
A	Germany	Veten	0.977571	0.498761	0.962224	0.0345296	0.452721	0.0422028	0.0268563	0.133514	0.19797	4.59167	11.6181	0.0230197	0.0153465	0.00767324	0.217153	0.334553	0.0452721	0.114331	0.00767324	0.0606186	0.422028	0	0.136584	0.0798017	0.0836383
A	Germany	Veten	0.809741	0.433467	0.915098	0.0338646	0.444756	0.0376274	0.0263392	0.135459	0.1919	5.23096	12.7173	0.0225764	0.0150509	0.00752547	0.225764	0.365738	0.0489156	0.112882	0.00376274	0.0564411	0.373264	0	0.0978312	0.0451528	0.0752547
A	Germany	Veten	0.960297	0.487514	0.814394	0.035073	0.397026	0.0385802	0.0245511	0.115039	0.156425	3.32632	9.62261	0.0175365	0.0175365	0.00701459	0.195006	0.289001	0.0729517	0.0315657	0.0035073	0.0385802	0.316358	0	0.0975028	0.0729517	0.0729517
B	Germany	Veten	1.25883	0.605609	0.907407	0.0335332	0.418494	0.0435931	0.0268265	0.144193	0.200528	3.69602	10.453	0.0100599	0.0100599	0.0134133	0.257535	0.361487	0.0301798	0.0704196	0	0.0268265	0.304481	0	0.0871862	0.053653	0.0704196
B	Germany	Veten	1.09695	0.574863	0.798617	0.0386995	0.413733	0.0386995	0.0281451	0.136504	0.164649	2.99464	8.02838	0.0140725	0.0105544	0.0105544	0.213903	0.273007	0.0211088	0.0492539	0	0.0175907	0.231493	0	0.0668446	0.0422176	0.0562902
B	Germany	Veten	1.35771	0.661706	0.97728	0.0399144	0.464005	0.0492694	0.0311831	0.13284	0.176497	3.24804	8.49179	0.0187099	0.0124733	0.00935494	0.232003	0.28439	0.0280648	0.0710976	0.00623663	0.0343015	0.309337	0	0.114754	0.0710976	0.0710976
A	Norway	Glen_Ample	0.717898	0.443119	0.367337	0.0289242	0.222716	0.0202469	0.0173545	0.1909	0.144621	2.09758	5.14272	0.0376014	0.054956	0.00867726	0.130159	0.101235	0.0376014	0.089665	0.00289242	0.00289242	0.208254	0.0752029	0.0636332	0.0376014	0.0404939
A	Norway	Glen_Ample	0.773103	0.490623	0.420341	0.0304105	0.262206	0.0236526	0.0202737	0.238554	0.127724	2.37134	5.49417	0.0337895	0.0473052	0.0101368	0.14124	0.10745	0.0473052	0.114208	0	0.00337894	0.252069	0.0973136	0.07704	0.0439263	0.0439263
A	Norway	Glen_Ample	0.734357	0.508558	0.515339	0.0339038	0.346497	0.0305135	0.0271231	0.265806	0.174944	2.01118	5.47479	0.0474654	0.0637392	0.00678077	0.157992	0.121376	0.0501777	0.138328	0.00339039	0.00339039	0.313272	0.124766	0.0806912	0.0474654	0.044075
B	Norway	Glen_Ample	0.879053	0.812031	0.678691	0.0458575	0.558756	0.035275	0.0317475	0.30266	0.186252	2.18705	5.69621	0.035275	0.0388025	0.007055	0.193307	0.14745	0.0388025	0.063495	0.0035275	0.0035275	0.23211	0.0529125	0.091715	0.063495	0.049385
B	Norway	Glen_Ample	0.619316	0.576506	0.522281	0.0342479	0.410975	0.0256859	0.0256859	0.251151	0.154116	2.10796	5.3735	0.0371019	0.0456639	0.00570798	0.174094	0.131284	0.0313939	0.0627878	0.00285399	0	0.196925	0.0428099	0.0713498	0.0485179	0.0399559
B	Norway	Glen_Ample	0.730125	0.645363	0.531372	0.0379969	0.411536	0.0292284	0.0263056	0.268901	0.166602	2.40842	5.66505	0.0409198	0.0496883	0.00876852	0.192907	0.151988	0.0350741	0.055534	0.00584568	0.00292284	0.21629	0.0467654	0.0818395	0.055534	0.0467654
A	Norway	Tulameen	1.03171	0.231637	0.37847	0.0169609	0.123087	0.0193839	0.0121149	0.141987	0.20983	1.51485	5.85005	0.0387677	0.0339217	0.00242298	0.0363447	0.284458	0.0387677	0.0339217	0.00242298	0.00969193	0.265074	0.052821	0.0314988	0.0411907	0.0460366
A	Norway	Tulameen	0.923976	0.174753	0.364766	0.0147679	0.0959911	0.0196905	0.0123066	0.137833	0.221518	1.9469	6.85377	0.0418423	0.0344584	0.00246131	0.0418423	0.411531	0.0418423	0.0344584	0.00492262	0.00984525	0.303234	0.0615328	0.0369197	0.0467649	0.0369197
A	Norway	Tulameen	1.06337	0.20056	0.361415	0.0152711	0.110461	0.0198524	0.0127259	0.132858	0.198015	2.32018	7.21354	0.0402138	0.0300331	0.00254518	0.0503945	0.426572	0.0402138	0.0300331	0.00509035	0.0101807	0.311021	0.113006	0.0351234	0.0453041	0.042759
B	Norway	Tulameen	1.20464	0.271074	0.422968	0.0204474	0.154816	0.0233684	0.0146053	0.186947	0.207395	2.13412	7.20682	0.0350526	0.0292105	0.00292105	0.0555	0.458021	0.0350526	0.0292105	0.00292105	0.00876316	0.361626	0.0262895	0.0379737	0.0525789	0.0496579
B	Norway	Tulameen	0.923388	0.2392	0.336041	0.0169473	0.135579	0.0169473	0.0145263	0.11621	0.164631	2.0792	6.23856	0.0314736	0.0217894	0.00242105	0.0605262	0.40141	0.0314736	0.0217894	0.0048421	0.00242105	0.292463	0.0411578	0.0338947	0.0435789	0.0290526
B	Norway	Tulameen	0.926247	0.194635	0.292941	0.01482	0.108186	0.01729	0.01235	0.155116	0.160056	1.76259	6.30935	0.0197599	0.0197599	0.00246999	0.0518699	0.379391	0.0197599	0.0197599	0.00493999	0.00246999	0.270711	0.0370499	0.0246999	0.0469299	0.0370499
A	Norway	Schönemann	1.50414	0.680963	1.24454	0.048909	0.677201	0.0526712	0.0413845	0.30474	0.150489	2.47931	8.65388	0.0564334	0.0263356	0.00752445	0.150489	0.323552	0.0564334	0.0263356	0.00376223	0.00376223	0.30474	0.285929	0.0564334	0.0526712	0.048909
A	Norway	Schönemann	1.26341	0.532318	1.04442	0.0437983	0.545794	0.0505365	0.0370601	0.289743	0.154979	2.34422	8.18287	0.0437983	0.0370601	0.0067382	0.144871	0.309957	0.0437983	0.0370601	0.0033691	0.0033691	0.33691	0.26279	0.067382	0.0640129	0.0606438
A	Norway	Schönemann	1.53495	0.655588	1.01915	0.0419996	0.554526	0.0387184	0.032156	0.25331	0.15553	2.48585	7.28693	0.0354372	0.0354372	0.00656244	0.145686	0.275622	0.0354372	0.0354372	0.00328122	0.00328122	0.262498	0.175217	0.0452808	0.0748118	0.0551245
B	Norway	Schönemann	1.08227	0.47308	0.811152	0.0387317	0.445414	0.0331986	0.0248989	0.271122	0.138327	2.59336	5.61609	0.030432	0.0193658	0.0055331	0.168759	0.359651	0.030432	0.0193658	0	0.0055331	0.243456	0.085763	0.0331986	0.0691637	0.0387317
B	Norway	Schönemann	0.838065	0.310577	0.570007	0.024649	0.292706	0.024649	0.0184867	0.268057	0.170694	2.5031	5.86892	0.0184867	0.0184867	0.00924336	0.136802	0.344469	0.0184867	0.0184867	0	0.00616224	0.280382	0.0702495	0.0332761	0.0733306	0.0363572
B	Norway	Schönemann	1.25865	0.471834	0.849428	0.0379491	0.42503	0.0347867	0.0252994	0.270704	0.182788	0.137249	2.82911	0.0284618	0.022137	0.00632485	0.176463	0.396568	0.0284618	0.022137	0	0.00632485	0.283353	0.0910779	0.0379491	0.0784282	0.044274
A	Norway	Veten	0.737996	0.368998	0.688463	0.0272714	0.355084	0.0384025	0.0272714	0.10185	0.231528	1.92736	8.73796	0.0662304	0.0166967	0	0.23932	0.311116	0.0662304	0.0166967	0	0	0.294419	0.256017	0.0935018	0.0384025	0.0523165
A	Norway	Veten	0.775727	0.420408	0.715974	0.0314772	0.402268	0.0389464	0.0261421	0.117373	0.190464	2.24449	9.4277	0.0602869	0.0181394	0.0106702	0.242748	0.30837	0.0602869	0.0181394	0.00266756	0.00266756	0.271558	0.219274	0.088563	0.0442815	0.0522842
A	Norway	Veten	0.797125	0.397345	0.679686	0.0298161	0.363878	0.0389435	0.0267737	0.114397	0.252524	2.31714	9.46205	0.0663256	0.0182548	0.0121698	0.282949	0.351708	0.0663256	0.0182548	0	0.00608492	0.285991	0.207496	0.0961418	0.0632832	0.0511133
B	Norway	Veten	0.91213	0.431227	0.859284	0.0343502	0.470862	0.0422772	0.0290656	0.219313	0.179678	2.25496	7.15753	0.0369925	0.0211386	0.0158539	0.208744	0.359885	0.0369925	0.0211386	0	0	0.251021	0.100408	0.0475618	0.0528465	0.00792697
B	Norway	Veten	0.750035	0.460918	0.87864	0.0338694	0.505095	0.0485952	0.0363237	0.13106	0.206161	2.34091	8.55472	0.0657753	0.0122715	0.0147258	0.284208	0.288626	0.0657753	0.0122715	0	0.0024543	0.235613	0.107008	0.070193	0.0461409	0.0559581
B	Norway	Veten	0.942814	0.580703	0.923494	0.0413999	0.569663	0.0496799	0.0386399	0.138	0.190992	1.83429	8.59131	0.0496799	0.0138	0.01656	0.301391	0.295871	0.0496799	0.0138	0	0.00275999	0.207552	0.0607199	0.0607199	0.0496799	0.0496799
A	Poland	Glen_Ample	0.984519	0.720947	0.879865	0.0503888	0.589161	0.0465127	0.0348845	0.321713	0.205431	1.52019	4.72802	0.0736451	0.0503888	0.0116282	0.201555	0.155042	0.0503888	0.116282	0.00387606	0.00387606	0.271324	0.100778	0.0775212	0.0581409	0.0387606
A	Poland	Glen_Ample	0.9995	0.530984	0.605352	0.0371838	0.35399	0.0334654	0.029747	0.313831	0.184432	1.37952	3.7987	0.0587504	0.0513136	0.0111551	0.21046	0.158403	0.0513136	0.107089	0.00371838	0.00371838	0.284084	0.0959342	0.110808	0.0699055	0.055032
A	Poland	Glen_Ample	0.731555	0.541091	0.699811	0.0389586	0.474717	0.031744	0.0281367	0.253231	0.19335	1.12763	3.6015	0.063488	0.0490589	0.0108218	0.182528	0.144291	0.0598808	0.126255	0	0.00360728	0.263331	0.0735884	0.0844102	0.0598808	0.0389586
B	Poland	Glen_Ample	0.921736	0.705128	0.861823	0.0506955	0.55765	0.0414781	0.0322608	0.382521	0.24426	1.80752	5.62167	0.0875649	0.0599128	0.013826	0.239651	0.184347	0.0599128	0.13826	0.00460868	0.00460868	0.322608	0.119826	0.0921736	0.0691302	0.0460868
B	Poland	Glen_Ample	0.558268	0.454315	0.684552	0.0385013	0.500516	0.0346511	0.030801	0.324951	0.190966	1.4284	3.93329	0.060832	0.0531317	0.0115504	0.217917	0.164015	0.0531317	0.110884	0.00385013	0.00385013	0.29415	0.0993333	0.114734	0.0723824	0.0569819
B	Poland	Glen_Ample	0.775203	0.414308	0.571658	0.0288716	0.303874	0.0252627	0.0216537	0.253348	0.19344	1.12816	3.60318	0.0635176	0.0490818	0.0108269	0.182613	0.144358	0.0599086	0.126313	0	0.00360895	0.263454	0.0736226	0.0844495	0.0599086	0.0389767
A	Poland	Tulameen	0.778885	0.147471	0.340085	0.015048	0.0902881	0.0180576	0.015048	0.219701	0.237759	1.04674	4.71063	0.0481537	0.0421344	0.0030096	0.0722305	0.337076	0.0331056	0.0782497	0.0120384	0.015048	0.343095	0.0932977	0.0601921	0.0451441	0.0210672
A	Poland	Tulameen	0.931195	0.17014	0.404921	0.0152455	0.103669	0.0213437	0.0152455	0.206729	0.231122	1.25806	4.97003	0.0548838	0.0396383	0.0030491	0.0548838	0.368331	0.0518347	0.125013	0.0182946	0.0182946	0.40797	0.128062	0.0762275	0.0457365	0.0274419
A	Poland	Tulameen	1.23092	0.210359	0.39522	0.0191236	0.111554	0.0223108	0.0159363	0.23267	0.203985	1.20223	4.58009	0.0509961	0.0350598	0.00318726	0.098805	0.39522	0.0254981	0.0573707	0.00956178	0.012749	0.337849	0.0637452	0.0478089	0.0478089	0.0254981
B	Poland	Tulameen	0.760901	0.144066	0.332233	0.0147006	0.0882034	0.0176407	0.0147006	0.201692	0.204632	0.834404	3.26941	0.0482179	0.0423376	0.00294011	0.0423376	0.352226	0.0229329	0.0540981	0.00823232	0.0111724	0.292835	0.0593903	0.0423376	0.0399855	0.0199928
B	Poland	Tulameen	0.856027	0.156406	0.372235	0.0140149	0.095301	0.0196208	0.0140149	0.200693	0.211905	0.827998	3.36581	0.0448475	0.0420446	0.00280297	0.0532565	0.337478	0.0252267	0.0532565	0	0.00840891	0.289827	0.119967	0.0532565	0.0392416	0.0224238
B	Poland	Tulameen	1.19645	0.204468	0.384153	0.018588	0.10843	0.021686	0.01549	0.2181	0.221198	0.810438	3.41214	0.0520465	0.0427525	0.00309801	0.0458505	0.346977	0.0247841	0.0551445	0.00929402	0.00929402	0.291832	0.0489485	0.0489485	0.0396545	0.021686
A	Poland	Schönemann	1.58985	0.623767	1.31233	0.0484352	0.623767	0.0549805	0.0386172	0.323338	0.155123	2.15537	5.76248	0.0418899	0.0287993	0.00981794	0.148578	0.361955	0.0386172	0.0935977	0	0.0386172	0.293884	0	0.0451625	0.0615258	0.0484352
A	Poland	Schönemann	1.73926	0.597739	1.37295	0.0496933	0.608388	0.0638913	0.0177476	0.348563	0.170377	2.14746	5.79211	0.0319457	0.0212971	0.00709904	0.14553	0.373409	0.0461438	0.113585	0	0.0461438	0.309518	0	0.0709904	0.0603418	0.0567923
A	Poland	Schönemann	1.2406	0.393818	1.16277	0.0350233	0.449077	0.0466978	0.0311318	0.386035	0.183678	2.3559	6.35479	0.0544807	0.0350233	0.00389148	0.136202	0.421058	0.0661552	0.187569	0.00389148	0.0778296	0.472426	0	0.0661552	0.0778296	0.0583722
B	Poland	Schönemann	1.22609	0.365664	0.856822	0.0288492	0.325996	0.0324554	0.0216369	0.351239	0.150737	2.35049	5.92852	0.0432738	0.0288492	0.00360615	0.136313	0.401725	0.0432738	0.103857	0.00360615	0.04688	0.380089	0	0.0504861	0.0786141	0.0504861
B	Poland	Schönemann	1.15438	0.442705	1.24161	0.0399816	0.577188	0.0472509	0.0327122	0.413627	0.181734	2.33783	5.3568	0.0545203	0.0327122	0.00363469	0.130849	0.409993	0.0508856	0.119945	0	0.0472509	0.359107	0	0.0399816	0.069059	0.0508856
B	Poland	Schönemann	1.4224	0.535232	1.37547	0.0439917	0.680405	0.0615884	0.0403257	0.349001	0.189164	2.58598	5.92202	0.0439917	0.0329938	0.00733195	0.167168	0.425986	0.0476577	0.101914	0.00366598	0.0476577	0.359999	0	0.0579224	0.0725863	0.0505905
A	Poland	Veten	0.671227	0.321304	1.24554	0.0292686	0.561307	0.0520331	0.0325207	0.165205	0.155449	2.10734	4.34672	0.100814	0.0260166	0.00325207	0.28228	0.450737	0.0520331	0.155449	0.00650414	0.0715455	0.493014	0	0.117075	0.0845538	0.0975621
A	Poland	Veten	0.982147	0.383102	1.01792	0.0325214	0.435137	0.0513838	0.0292693	0.173664	0.189925	4.04241	11.0046	0.0806531	0.022765	0.00650428	0.222446	0.370094	0.0448795	0.132037	0.00325214	0.0578881	0.44099	0	0.100166	0.077401	0.077401
A	Poland	Veten	1.14871	0.465476	1.30054	0.0366255	0.558039	0.0659258	0.0366255	0.194448	0.204437	2.62505	7.36638	0.0692554	0.0166479	0.00665917	0.270362	0.442169	0.0526075	0.151829	0.00332959	0.0625962	0.455487	0	0.0958921	0.072585	0.0792442
B	Poland	Veten	1.08367	0.413993	1.17309	0.0298075	0.46036	0.0463672	0.0264955	0.172221	0.198716	2.55152	8.62496	0.0827985	0.0231836	0.00662388	0.308011	0.46036	0.0364314	0.0927344	0.00331194	0.0397433	0.407369	0	0.0662388	0.0827985	0.0861105
B	Poland	Veten	1.10605	0.513754	1.4829	0.0432332	0.700378	0.0576443	0.0360277	0.179418	0.222651	3.63951	9.87951	0.0864664	0.0252194	0.00720553	0.269487	0.427288	0.046836	0.118171	0.00360277	0.0504387	0.430891	0	0.10448	0.0864664	0.0792609
B	Poland	Veten	1.01443	0.477295	1.37774	0.0391809	0.648266	0.0534285	0.035619	0.135352	0.374	1.63776	14.3979	0.0391809	0.0106857	0.0783618	0.195905	0.217276	0.0498666	0.0641142	0	0.0391809	0.0569904	0.0178095	0.0142476	0.0284952	0.0391809

## Sheet: Table S4
Table S4. Volatiles profiling of raspberry fruits harvested in 2018. Volatile relative content is shown and represent each biological replicate per harvest date.
Harvest	Location	Genotype	Acetone	Methyl acetate	Ethyl acetate	Isopentyl butanoate	1-Penten-3-ol	1-Penten-3-one	Pentanal	Methyl butyrate	2-Pentenal	Ethyl butanoate	3-Hexenal	Hexanal	Butyl acetate	Methyl pentanoate	2-Hexenal	1-Hexanol	Isopentyl acetate	2-Heptanone	Propyl butanoate	2-Heptanol	Heptanal	Pentyl acetate	Prenyl acetate	Methyl hexanoate	2-Heptenal	Methyl hex-2-enoate	Benzaldehyde	6-Methyl-5-hepten-2-one	Butyl butanoate	2-Pentylfuran	Ethyl hexanoate	Decane	cis-3-Hexenyl acetate	Octanal	2,4-Heptadienal	Limonene	Mesifurane	E-2-Octenal	1-Octanol	Acetophenone	2-Nonanone	2-Nonanol	Linalool	Nonanal	Methyl benzoate	Methyl octanoate	E-2-Nonenal
A	Germany	Glen_Ample	0.4503	0.1504	0.0157	0.6039	0.1962	0.6763	0.003	0.1867	0.8552	1.9374	1.4865	0.6697	1.6894	0.0915	0.4957	0.1198	0.4318	0.4587	1.4674	0.0097	0.9398	0.4008	0.0676	0.2212	0.3846	1.1812	0.7443	0.9745	0	0.1997	0	1.013	0.1291	0.3111	0.3517	0.3365	0	0.4759	0.7126	0.2404	0.7205	2.2753	0.1816	0.2277	0.3344	0.77	0.1332
A	Germany	Glen_Ample	1.0246	0.4749	0.1718	1.3892	0.9854	2.1462	0.9315	0.7234	2.0011	5.2646	3.5936	2.3825	1.1061	0.0318	2.1404	0.2861	0.1462	1.7731	0.5063	0.0233	1.51	0	0.1605	2.7731	1.04	2.3223	1.6431	3.162	0	1.2186	1.2825	0.6977	0.4563	1.1234	0.999	0.6279	0	0.9945	1.5915	0.5893	3.2359	1.0397	0.4532	1.1772	0.8503	3.737	0.7312
B	Germany	Glen_Ample	0.6218	0.353	0.0547	0.8567	0.5215	1.5184	0.5097	0.961	1.2861	2.8538	2.0458	0.7618	0.4912	0.0389	1.4349	0.1338	0	0.5486	0.3113	0.018	0.9121	0.0364	0.0977	0.7988	0.526	1.2477	1.1649	1.6209	0	0.3614	1.4347	0.5342	0.2381	0.7938	0.3933	0.3617	1.1223	0.474	0.9242	0.3718	1.2618	0.7257	0.3109	0.9922	1.1957	2.9907	0.1944
B	Germany	Glen_Ample	2.8354	1.3204	0.3906	1.8426	1.2446	2.8766	2.1901	2.7571	3.0674	5.5229	4.5976	2.6618	1.3648	0.1877	3.6401	0.5033	0.2497	1.9683	1.3029	0.0558	1.6372	0.1299	0.4663	1.812	1.3944	3.3536	2.4566	3.4724	0	1.8351	0.6578	1.0199	0.829	1.4041	1.4039	0.8773	0	0.9583	1.7951	0.6756	3.5496	1.8292	0.712	1.2392	1.116	3.871	0.4562
A	Germany	Schönemann	0.8195	0.8977	1.5393	0.9283	0.6544	0.8959	0.3102	0.8791	0.844	2.0735	2.0523	1.6035	0.9842	0.0562	0.7633	0.2772	4.2871	1.8201	1.6319	0.0397	0.8952	2.0009	0.6096	9.7785	0.662	1.2039	0.564	0.9566	0	0.2555	773.485	0.2481	0.806	0.4009	0.5077	0.4407	60.8886	0.5832	0.603	0.2988	1.1103	5.5725	0.3566	0.1734	0.6019	0.4967	0.7244
A	Germany	Schönemann	1.6803	2.1569	3.0311	1.2154	0.2887	0.7616	0.3554	0.6991	0.7581	2.1056	1.5883	1.2016	1.621	0.1339	1.1346	0.1536	5.2607	2.7325	2.0752	0.0514	0.8855	1.6274	0.8717	13.9364	0.7407	1.4095	0.7191	1.4046	0	0.5124	1316.49	0.3504	0.8307	0.4141	0.6254	0.7569	398.676	0.6202	0.696	0.4718	1.7936	0.4963	0.6921	0.1237	0.8961	1.0652	1.0201
B	Germany	Schönemann	3.3615	2.4837	4.6768	1.2416	0.2865	0.8761	0.9741	0.1667	1.6278	5.0284	2.1342	2.7392	1.1953	0.0365	1.4834	0.257	2.7106	5.368	3.177	0.2017	0.9673	1.5186	1.4147	6.5621	0.799	2.3851	0.8638	1.2484	0	0.2827	167.911	0.3733	0.6813	0.5744	0.6433	2.6409	529.666	0.6272	1.1618	0.4972	4.6454	4.5092	2.7165	0.3079	0.6331	0.7723	1.5363
B	Germany	Schönemann	6.0666	4.4674	6.2666	2.1368	0.3494	1.281	2.5518	0.6762	1.82	4.0671	2.6883	2.6094	3.8754	0.1641	2.7376	0.2476	5.9053	4.6804	1.909	0.1032	1.3865	3.27	1.4906	9.2757	1.1061	2.1661	1.1542	1.6777	0	0.9755	362.969	0.6515	0.8246	0.9974	1.1279	2.1127	215.079	1.0682	1.6494	0.7766	5.1069	2.4833	2.5906	0.8307	2.7921	2.2487	1.8268
A	Germany	Tulameen	0.7051	0.324	0.1477	0.6673	1.0242	0.9822	0.1829	0.1785	0.657	20.0269	1.647	1.3011	1.9065	0.0166	0.7555	0.2936	2.4274	0.8068	105.073	1.1708	0.7425	0	0.0529	0.8471	0.4332	7.1905	0.5155	1.2074	0	0.1034	0.9644	5.2745	0.2939	0.3652	0.8214	0.304	9.8591	1.1341	1.0464	0.7562	1.3523	517.068	0.1707	0.0832	1.207	0.0067	0.7841
A	Germany	Tulameen	0.9567	0.477	0.1674	1.0033	0.5045	0.9598	0.3013	0.3618	0.9369	1.067	1.2617	0.7416	0.3751	0.4589	1.0316	0.1815	0.0274	0.7853	0.9691	1.0262	0.6748	0	0.0619	2.2287	0.883	1.4306	0.6683	1.1761	0	1.2407	32.7705	0.3566	0.2607	0.308	1.0192	0.2205	85.7129	0.6353	0.5501	0.9124	1.5427	0.7315	0.1475	0.1262	2.3196	1.8484	0.5939
B	Germany	Tulameen	1.1128	0.7876	1.7327	1.0636	0.5017	0.8417	0.5661	0.4526	1.177	1.7757	1.2824	0.819	1.069	0.8622	1.0176	0.1589	0.0473	1.8742	0.9542	1.2917	0.889	0	0.2626	2.5522	0.1339	0.5236	0.624	0.9065	0	0.472	36.8254	0.3526	0.2066	0.3373	0.6338	0.675	395.776	0.4109	0.5042	1.1378	5.0427	2.3485	0.602	0.2324	2.1555	1.4159	0.9438
B	Germany	Tulameen	2.4261	0.906	1.4088	2.0933	1.4222	1.8391	1.3636	0.5748	3.217	2.8001	2.2989	1.2188	1.1097	4.8549	2.3748	2.5807	0.2393	2.1467	3.0604	1.6578	0.9207	0	0.4451	2.7523	0.0468	0.8121	0.9457	1.0741	0	1.2211	0	0.4861	0.2252	0.5533	1.203	0.9188	689.819	0.6352	0.8709	1.8541	4.296	3.2012	0.9873	0.4236	3.1844	2.4412	1.2237
A	Germany	Veten	0.9839	2.1975	0.4182	0.8369	0.1045	0.4081	0.2571	0.9921	0.4331	0.6846	1.2444	1.1154	0.9492	1.6393	0.62	0.6317	0.1218	0.5454	0.485	3.599	0.7987	0	0.0732	3.0602	0.5386	0.9603	0.8019	1.5374	0	0.4312	1.2626	0.4699	0.5077	0.339	0.6034	0.3103	0	0.4812	0.8242	0.2547	0.5625	1.635	0.1658	0.2643	2.0483	1.2991	0.2641
A	Germany	Veten	2.4308	4.2233	0.6783	0.0133	0.4013	1.0679	0.8714	1.9953	0.9737	1.2421	2.2283	1.781	1.7738	2.5035	1.7503	1.0252	0.3614	0.5305	0.7292	7.103	1.0734	0.107	0.1006	1.8	0.6719	0.7764	0.9285	1.5257	0	0.6354	3.3782	0.5287	0.669	0.5562	0.8294	0.2406	0	0.5929	0.9878	0.3246	0.4571	3.2579	0.1713	0.2931	3.6987	1.9007	0.4943
B	Germany	Veten	2.0539	2.5535	1.8355	1.3787	0.0835	0.3234	0.2322	0.5763	0.7395	0.7948	0.819	0.607	0.6768	5.5838	0.4788	0.1925	0.2841	1.5835	0.4522	1.7351	0.4175	0	0.0991	2.8379	0.4139	0.6732	0.605	1.1438	0	0.3628	142.761	0.3616	0.1648	0.2794	0.4136	0.2586	53.643	0.3305	0.6723	0.2215	1.0176	1.9238	0.2211	0.3085	1.1623	1.8194	0.6342
B	Germany	Veten	5.1358	4.7856	2.7673	1.8848	0.1897	0.6558	1.5958	1.9338	1.3527	0.9704	1.5081	1.4663	1.8529	9.5846	1.776	0.4991	1.8461	2.6737	1.7045	5.3954	1.3165	0	0.1985	4.4624	0.9684	1.2464	1.2354	2.883	0	1.911	154.879	1.0501	0.5414	0.8896	1.5437	0.5841	3.0913	0.8654	1.597	0.4446	2.4543	5.0047	0.4823	0.8453	4.3691	4.9396	1.1901
A	Poland	Glen_Ample	1.0844	0.4611	0.436	0.5771	0.4467	1.1217	0.469	0.1003	1.4378	4.2557	1.8535	2.3276	52.2344	0.129	0.5122	1.1024	7.3422	2.0594	2.4611	0.017	0.7475	15.1911	0.1003	3.2268	0.0465	1.2516	0.8341	3.0524	1.3077	0.2344	0	0.2479	0.1649	2.2929	0.303	0.2137	0	0.5124	0.9845	0.316	10.7567	2.7661	0.1118	0.4647	0.1522	1.0572	0.4119
A	Poland	Glen_Ample	1.1388	0.5721	1.2582	0.7206	0.6403	1.618	1.2105	0.2183	1.7286	4.2688	2.0149	1.6761	42.1839	0.0272	1.5447	2.7875	6.1316	0.785	1.9939	0.0134	1.0854	14.924	0.1108	0.8105	0.8062	1.6622	0.8648	3.6486	2.3017	0.8303	0	0.3359	0.0943	3.4006	0.6543	0.274	0	0.8076	1.3427	0.4109	5.2164	1.335	0.2179	0.8111	0.1448	0.9932	0.8879
B	Poland	Glen_Ample	1.1839	1.8752	0.5836	0.9753	0.5953	0.7416	0.7786	0.2929	1.042	2.2448	1.1488	1.4526	41.844	4.5592	0.869	1.4526	5.4133	1.2504	1.7655	3.3213	0.9176	10.7059	0.0867	6.3048	0.7869	1.3586	0.8413	2.2595	0.531	0.203	0	0.2579	0.7252	1.9738	0.4696	0.2214	0	0.7646	1.2184	0.2875	1.8224	4.7255	0.1391	0.8083	3.0421	2.312	1.0504
B	Poland	Glen_Ample	1.3722	0.5647	0.9452	0.7871	0.6122	1.4296	0.5946	0.2556	1.8307	3.2924	1.6666	0.9436	49.2085	0.0684	1.8011	1.2432	6.2487	1.1321	1.7904	0.0169	0.9584	10.3945	0.0842	1.2048	0.6723	1.4963	1.7172	2.1757	0.8489	1.2844	0	0.2811	0.2756	1.9952	0.9961	0.2584	0	0.8759	1.2511	0.4643	1.8968	4.3543	0.1604	0.3784	0.1885	1.4237	0.5245
A	Poland	Schönemann	1.1565	0.7834	0.5405	0.5307	0.178	0.2258	0.8124	0.3171	0.443	0.2691	0.2405	0.2926	34.0416	0.1969	0.1651	0.7847	7.673	7.1596	7.0219	0.1182	0.2895	16.0949	1.0078	11.0111	0.0127	0.0269	0.3855	1.0368	0.4217	0.0031	0	0.2098	0.5588	1.445	0.1161	0.3573	37.2849	0.2022	0.4738	0.2186	4.7329	1.6225	0.339	0.3598	0.5825	0.7675	1.8276
A	Poland	Schönemann	1.7363	1.2512	1.0347	0.7818	0.36	0.6137	0.984	0.3255	1.0076	1.7531	0.8672	1.6685	47.4062	0.4811	0.7517	1.3534	10.5898	9.6073	8.5286	0.2087	0.4742	21.5726	1.6318	8.4998	0.1912	0.6552	0.6088	1.6694	0.3462	0.114	0	0.2594	0.4478	1.7554	0.3785	0.6439	31.6714	0.4079	0.9871	0.3595	6.1645	4.722	0.5915	0.4747	0.3288	1.1065	1.8708
B	Poland	Schönemann	1.1979	1.3115	0.76	0.5153	0.4956	0.7602	0.5513	0.1134	1.0971	5.0951	1.6064	2.5506	29.0471	0.0055	0.7408	1.2882	6.2825	0.733	1.0765	0.038	0.9866	14.8942	0.3548	7.6459	0.7405	1.846	0.5504	1.3607	0.371	0.1127	0	0.177	2.5334	1.8991	0.4572	0.7827	6.0539	0.713	0.7671	0.2091	0.9916	0.6863	0.9365	0.3428	0.1708	0.5647	1.0205
B	Poland	Schönemann	8.4616	1.5429	0.4416	7.0011	0.1887	1.7396	5.7739	3.3914	2.447	0.1144	0.1101	0	358.713	71.9789	0.2862	11.8713	35.7669	3.9785	7.8689	0.331	3.6718	49.1621	0.2551	4.0825	0.6147	0.0272	7.019	11.7562	4.3761	5.6127	0	3.4382	0.3109	10.4861	5.0193	1.3167	0	4.3807	10.0146	1.9646	21.6117	6.2533	0.9281	2.3896	1.2547	34.756	3.4583
A	Poland	Tulameen	0.8137	0.2808	0.242	0.401	0.6444	0.9845	0.2415	0.2303	0.8817	3.7631	1.4991	0.8984	59.2135	0.0189	0.4742	1.3697	8.225	0.3162	1.4539	0.5647	0.5664	17.2088	0.0513	0.838	0.5737	1.4282	0.5634	1.357	1.6062	0.2357	0	0.1745	0.2256	2.09	0.4074	0.1124	0	0.5194	0.5058	0.4279	0.8333	0.3246	0.0852	0.1784	4.1951	0.691	0.451
A	Poland	Tulameen	1.1159	0.4039	0.2815	0.8689	0.8448	1.388	0.4816	0.2716	1.3894	4.4189	2.0799	1.4234	33.3308	0.1115	1.3214	1.3409	4.9726	0.5156	1.3409	1.0629	0.8703	8.7329	0.0347	1.4009	0.6429	1.6755	0.8938	1.2608	0.6106	1.3692	0	0.2376	0.2351	1.2754	1.0908	0.1669	0	0.7272	0.8143	0.7908	1.218	0.8196	0.127	0.2126	3.7818	1.5559	0.9454
B	Poland	Tulameen	0.8185	0.3152	0.5905	0.6617	0.6227	0.9612	0.2615	0.0786	1.2044	3.0034	1.18	0.7045	17.1226	0.0972	0.815	0.9412	2.3555	0.519	1.4062	0.4944	0.59	4.2781	0.023	0.6066	0.5361	1.1408	0.5933	1.0992	0.3686	0.964	0	0.1503	0.149	0.8986	0.8369	0.3299	0.9442	0.5966	0.6045	0.7256	1.3957	1.1414	0.3318	0.1761	1.2776	0.8097	0.4638
B	Poland	Tulameen	1.1947	0.3913	0.6535	0.7191	0.8371	1.3449	0.5186	0.0786	1.5978	2.1902	1.3045	0.7264	25.7717	0.1961	1.7217	1.3064	3.2601	0.8241	1.7239	0.7044	0.7297	5.6177	0.0307	1.3509	0.9177	1.2088	1.0416	1.6473	0.647	2.0054	0	0.2695	0.2332	1.4427	1.6518	0.222	0	1.0406	0.9807	1.3848	2.1685	1.4152	0.1558	0.329	2.9657	1.5281	1.0643
A	Poland	Veten	0.8354	1.3232	0.4118	0.6882	0.4201	0.5233	0.5494	0.2067	0.7353	1.584	0.8107	1.025	29.5268	3.2171	0.6132	1.025	3.8198	0.8823	1.2458	2.3436	0.6475	7.5545	0.0612	4.4489	0.5553	0.9587	0.5937	1.5944	0.3747	0.1433	0	0.182	0.5118	1.3928	0.3313	0.1562	0	0.5395	0.8597	0.2029	1.2859	3.3345	0.0982	0.5703	2.1466	1.6314	0.7412
A	Poland	Veten	1.6701	1.3026	2.7976	0.8435	0.2999	0.6751	0.5017	0.2014	1.0351	2.0125	1.1335	1.2123	51.6128	6.3644	1.135	2.7731	7.0406	1.0016	1.9172	2.0881	0.7224	12.1689	0.0608	1.6535	0.7793	0.9774	0.8189	2.9148	0.9258	0.8673	0	0.3601	0.1825	2.0633	0.8455	0.5011	0	0.8383	1.086	0.303	1.8047	2.5506	0.4202	0.2305	1.82	1.6633	0.7998
B	Poland	Veten	1.2165	3.1421	1.3834	0.7602	0.3318	0.6727	0.776	0.2215	0.8749	2.5524	1.233	1.62	30.913	2.9288	0.8794	1.345	5.0672	0.6028	1.1227	2.7222	0.7102	9.0873	0.0932	5.2806	0.6738	1.1113	0.6871	2.2296	0.4077	0.1863	0	0.2759	0.3465	1.5911	0.4002	0.3745	0	0.8763	1.0648	0.2029	1.1688	2.1516	0.3637	0.7546	1.1531	1.2858	0.7965
B	Poland	Veten	1.6747	1.7391	1.949	1.0493	0.1832	0.6267	0.8951	0.2411	1.2073	0.7072	0.7087	1.1234	48.5433	7.1072	1.465	1.6872	6.3625	1.9231	2.3192	1.9567	1.0402	10.2958	0.0618	6.2261	0.7182	0.6782	1.0209	2.0364	0.5552	1.3507	0	0.3527	0.2609	2.1449	1.2222	0.3674	0	1.4625	1.4967	0.264	1.8103	2.3835	0.272	0.6746	1.9632	2.2182	1.1516
A	Norway	Glen_Ample	0.7809	0.2611	0.0622	1.5478	1.8481	1.3164	0.1084	0.9108	1.8753	31.0728	5.1436	1.6496	0.2415	0	1.0305	0.2146	0.1556	0.2722	1.349	0.0148	1.0462	0.3936	0.0762	0.2543	0.6958	4.893	0.7951	1.2372	0	0.3527	0	0.6999	0.8842	0.4939	0.3164	0.0778	0	0.541	0.6795	0.2405	0.7918	1.0328	0.1174	0.419	0.3393	0.6102	0.2927
A	Norway	Glen_Ample	0.7613	0.2099	0.0856	1.2856	1.0357	1.2712	0.3066	0.4931	1.9652	20.2962	3.4612	1.0159	0.1761	0	1.8985	0.1924	0.0671	0.2538	0.7677	0.0094	1.2082	0	0.0666	0.235	0.7481	4.6358	0.9244	1.1594	0	1.2986	0	0.2574	0.7331	1.0303	0.7517	0.1006	0	0.8328	1.2812	0.3191	1.0495	0.4037	0.1273	1.5861	0.3155	0.9008	0.4505
B	Norway	Glen_Ample	0.9388	0.7137	0.7179	2.5798	1.1657	1.3008	0.924	0.9639	3.1522	26.523	3.8378	2.7297	0.4934	0.7847	1.4667	0.2856	0.3203	2.3032	2.114	0.0341	1.2429	0.7893	0.5338	5.0145	0.053	5.039	1.1363	3.7196	0	0.8462	0	0.57	0.6038	0.8665	0.6626	0.114	0	0.7901	1.7077	0.5024	3.4899	1.3938	0.1647	0.6777	0.125	1.4304	0.8594
B	Norway	Glen_Ample	1.1587	0.6249	0.7959	1.7781	0.9008	1.0207	1.1492	1.1253	2.0263	9.6392	2.2779	1.2317	0.7007	1.2096	2.2538	0.3028	0.6594	1.6162	1.0789	0.0214	1.0846	0.4169	0.3863	5.2407	0.8666	3.7937	0.8798	2.8384	0	1.7836	0	1.2149	0.3591	0.7437	1.0168	0.0607	0	0.801	1.2312	0.3776	1.506	0.5345	0.0731	0.6221	0.2607	1.133	0.4538
A	Norway	Schönemann	1.2917	0.8865	0.666	1.2937	0.3682	0.7406	0.6241	0.5053	1.8957	19.2291	2.6868	2.26	0.3456	0.5958	0.7462	0.0987	4.8376	6.8293	9.2826	0.1078	0.7865	3.6541	1.4863	11.3707	0.6131	3.7215	0.5419	1.6531	0	0.1576	0	0.3095	0.5166	0.5824	0.3509	0.2608	29.3821	0.5958	0.9493	0.3462	4.7823	1.3134	0.4469	0.6189	0.1896	0.626	1.8148
A	Norway	Schönemann	2.1265	1.1964	0.9465	2.0642	0.2479	0.5634	0.6622	0.7867	1.5271	6.232	1.9599	1.9959	0.4696	0.6484	1.4477	0.1	3.4065	5.2718	4.0269	0.0473	0.6919	3.1534	1.3127	10.8423	0.7853	2.495	0.6328	1.3571	0	0.4801	0	0.2801	0.6776	0.6244	0.6476	0.2457	13.0814	0.6474	1.0314	0.4782	3.1852	0.6817	0.3478	0.6664	0.3802	0.9115	1.6989
B	Norway	Schönemann	1.2156	0.8964	0.867	1.9849	0.2428	0.4628	0.7596	1.3979	1.1155	3.4601	1.2651	0.9325	0.3768	0.487	0.8212	0.1023	11.1081	3.0844	3.2574	0.0567	0.595	9.7626	1.3268	6.8686	0.6657	2.0744	0.5551	2.9292	0	0.3682	0	0.3725	0.8763	0.604	0.4798	0.1043	39.5894	0.5518	0.7416	0.3035	1.6979	0.405	0.1366	0.3308	0.2706	0.7457	1.5836
B	Norway	Schönemann	1.3955	1.4705	1.3697	2.8732	1.0271	0.8841	1.6492	4.3547	1.2145	3.6084	2.8042	2.6939	0.3513	0.1126	3.4954	0.5816	6	2.5192	2.9439	0.0936	1.5364	5.3095	0.9125	4.9272	1.4813	2.482	1.3236	2.6428	0	3.8489	0	1.6596	2.449	1.3421	2.394	0.1537	3.8515	1.2683	1.5416	0.5727	1.38	0.3775	0.1339	1.4709	1.8761	0.4715	1.8196
A	Norway	Tulameen	0.4697	0.3964	0.3127	1.4868	0.7443	0.6655	0.4076	0.5925	1.3275	6.7705	1.501	0.5384	0.258	1.9007	0.6654	0.07	0.1603	0.8184	1.5216	0.4797	0.4209	0.1503	0.0401	4.1638	0.0254	1.1917	0.4264	0.81	0	0.5165	0	0.2074	0.2466	0.2634	0.4594	0.0439	4.6389	0.4659	0.4917	1.0538	0.8862	0.4582	0.0512	0.2634	2.4094	0.9339	0.5435
A	Norway	Tulameen	0.7836	0.5859	0.2486	2.3952	1.3047	0.8821	0.4537	0.6525	1.6436	3.8818	1.5982	0.8105	0.2051	3.0285	2.1374	0.2015	0.1104	0.6957	1.7548	0.8621	0.6764	0	0.0465	6.1176	0.3596	1.5839	0.6898	1.1041	0	1.5138	0	0.4989	0.2211	0.3545	0.9841	0.0506	8.6226	0.6575	0.6129	1.4425	0.7046	0.5663	0.0413	0.2096	3.9189	1.4935	0.466
B	Norway	Tulameen	0.8727	0.4734	0.573	1.9195	1.0054	0.6682	0.3921	0.0588	1.8984	10.6258	1.6917	0.8174	0.1999	3.8574	1.1254	0.3101	0	0.8578	1.164	0.994	0.7248	0	0.0589	3.6155	0.0371	0.1153	0.6399	1.1174	0	0.8988	0	0.2277	0.4482	0.3692	0.8444	0.0735	24.1967	0.6409	0.8417	1.4278	1.2558	2.3313	0.0869	0.2792	2.2981	1.6124	1.2904
B	Norway	Tulameen	0.7651	1.0212	1.0371	2.4601	1.0313	0.7905	0.7329	1.3312	1.5764	2.3884	1.678	1.5285	0.6705	3.6339	2.3537	0.236	0.8622	1.408	0.922	1.3866	0.8316	0.1112	0.0461	8.59	0.0185	0.7443	0.6645	1.4622	0	1.8821	0	0.6817	0.4361	0.4537	1.2273	0.0835	0	0.6683	0.7149	1.3443	1.1467	0.4686	0.059	0.4878	2.0315	1.2491	1.2493
A	Norway	Veten	0.9811	0.5797	1.4526	1.5134	0.926	0.5994	0.2576	1.4351	0.7233	7.4646	1.8034	0.7269	0.2042	10.5724	0.583	0.0891	1.7791	0.4404	2.8814	0.8041	0.7388	0	0.0945	0.2533	0.5339	2.2743	0.4171	0.9966	0	0.4161	0	0.5802	0.4624	0.2705	0.331	0.0439	0	0.4817	0.4495	0.2422	0.7878	0.3461	0.0593	0.2561	0.9839	0.5871	0.0646
A	Norway	Veten	0.984	0.5962	0.9713	1.2862	0.4988	0.5402	0.7228	1.0137	1.0278	5.2483	1.5336	1.1002	1.2473	10.1236	1.2696	0.1204	1.3195	0.6485	1.0101	1.1821	0.9631	0.1478	0.0579	0.8061	0.7156	1.9183	0.501	1.3789	0	1.1482	0	0.3489	0.6919	0.6351	0.7856	0.0601	0	0.7722	0.7805	0.2993	1.2677	0.3331	0.0812	0.9498	1.2356	1.1125	0.5557
B	Norway	Veten	1.1572	0.5174	1.6436	1.5152	0.39	0.4731	0.4818	1.2012	1.2259	6.9938	1.593	1.1981	0.3929	20.9427	0.6593	0.0934	5.9821	2.2092	2.4478	0.6371	0.7334	2.4198	0.4952	2.3833	0.5883	1.8924	0.4558	2.2274	0	0.6171	0	0.3201	0.4382	0.3772	0.529	0.0934	0.606	0.538	0.6393	0.2625	1.4159	0.46	0.1209	0.4444	0.4519	0.6215	0.6641
B	Norway	Veten	2.0152	0.9931	1.9454	1.9473	0.6387	0.5209	0.7585	0.9505	3.7438	6.0173	1.614	1.4559	0.4447	68.4927	1.9261	0.2958	2.0126	2.9801	3.8587	2.0161	0.6982	0.0601	0.2325	3.3829	0.6528	2.0045	0.6343	1.4558	0	1.3561	0	1.3249	0.1283	0.397	0.9368	0.1505	0.1121	0.575	1.0954	0.2291	1.5459	1.2401	0.1681	0.4902	0.3851	1.5752	0.5995
[truncated: 18 more columns]
